# Supplementary material for: Triterpenes from the Mushroom Hypholoma lateritium: Isolation, Structure Determination and Investigation in Bdelloid Rotifer Assays
Source: PubMed Central journal article supplement (PMC6359218; doi:10.3390/molecules24020301), 2019-01-15
Supplement: molecules-24-00301-s001.pdf [file molecules-24-00301-s001.pdf]

# Triterpenes from the Mushroom *Hypholoma lateritium*: Isolation, Structure Determination, and Investigation in Bdelloid Rotifer Assays

Bayar Chuluunbaatar<sup>1</sup>, Zoltán Béni<sup>2</sup>, Miklós Dékány<sup>2</sup>, Bernadett Kovács<sup>1</sup>, András Sárközy<sup>1</sup>, Zsolt Datki<sup>3</sup>, Lilla Mácsai<sup>3</sup>, János Kálmán<sup>3</sup>, Judit Hohmann<sup>1,4</sup>, Attila Ványolós<sup>1\*</sup>

<sup>1</sup> Department of Pharmacognosy, University of Szeged, Eötvös u. 6, H-6720 Szeged, Hungary;

*ch\_bayaraa@pharmacognosy.hu, kovacs.bernadett@pharmacognosy.hu, sarkozy@pharmacognosy.hu*

<sup>2</sup> Spectroscopic Research, Gedeon Richter Plc., Gyömrői út 19-21, H-1103 Budapest, Hungary; *z.beni@richter.hu,*

*M.Dekany@richter.hu*

<sup>3</sup> Department of Psychiatry, Faculty of Medicine, University of Szeged, Kálvária sgt. 57, H-6725 Szeged, Hungary,

*datkizsolt@gmail.com, macsai.lilla@gmail.com, kalman.janos@med.u-szeged.hu*

<sup>4</sup> Interdisciplinary Centre for Natural Products, University of Szeged, Eötvös u. 6, H-6720 Szeged, Hungary;

*hohmann@pharm.u-szeged.hu*

\*Correspondence: *vanyolosa@pharmacognosy.hu*; Tel.: +36-62-54-6455

## TABLE OF CONTENTS

|                                                                                            |           |
|--------------------------------------------------------------------------------------------|-----------|
| <b>NMR and MS spectra and spectral data of compound 1</b> .....                            | <b>4</b>  |
| Figure S1. Full HRMS spectrum of compound 1.....                                           | 4         |
| Figure S2. HR-MS/MS spectrum of compound 1.....                                            | 5         |
| Figure S3. <sup>1</sup> H NMR spectrum of compound 1.....                                  | 5         |
| Figure S4. <sup>13</sup> C NMR spectrum of compound 1.....                                 | 5         |
| Figure S5. ROESY spectrum of compound 1.....                                               | 6         |
| Figure S6. COSY spectrum of compound 1.....                                                | 6         |
| Figure S7. HSQC spectrum of compound 1.....                                                | 7         |
| Figure S8. HMBC spectrum of compound 1.....                                                | 7         |
| <b>NMR and MS spectra and spectral data of compound 2</b> .....                            | <b>8</b>  |
| Figure S9. Full HRMS spectrum of compound 2.....                                           | 8         |
| Figure S10. HR-MS/MS spectrum of compound 2.....                                           | 9         |
| Figure S11. <sup>1</sup> H NMR spectrum of compound 2.....                                 | 9         |
| Figure S12. <sup>13</sup> C NMR spectrum of compound 2.....                                | 10        |
| Figure S13. HMBC spectrum of compound 2.....                                               | 10        |
| Figure S14. HSQC spectrum of compound 2.....                                               | 11        |
| Figure S15. COSY spectrum of compound 2.....                                               | 11        |
| <b>NMR and MS spectra and spectral data of compound 5</b> .....                            | <b>12</b> |
| Figure S16. Full HRMS spectrum of compound 5.....                                          | 12        |
| Figure S17. HR-MS/MS spectrum of compound 5.....                                           | 12        |
| Table S1. <sup>1</sup> H and <sup>13</sup> C NMR assignments of compound 5.....            | 13        |
| Figure S18. <sup>1</sup> H spectrum of compound 5.....                                     | 14        |
| Figure S19. <sup>13</sup> C spectrum of compound 5.....                                    | 14        |
| <b>NMR and MS spectra and spectral data of compounds 8, 9 and 10</b> .....                 | <b>15</b> |
| Table S2. <sup>1</sup> H and <sup>13</sup> C NMR assignments of compounds 8, 9 and 10..... | 16        |
| Figure S20. Full HRMS spectrum of compound 8.....                                          | 17        |
| Figure S21. HR-MS/MS spectrum of compound 8.....                                           | 18        |
| Figure S22. <sup>1</sup> H spectrum of compound 8.....                                     | 18        |
| Figure S23. <sup>13</sup> C NMR spectrum of compound 8.....                                | 19        |
| Figure S24. Full HRMS spectrum of compound 9.....                                          | 19        |
| Figure S25. HR-MS/MS spectrum of compound 9.....                                           | 20        |
| Figure S26. <sup>1</sup> H spectrum of compound 9.....                                     | 20        |
| Figure S27. <sup>13</sup> C spectrum of compound 9.....                                    | 21        |
| Figure S28. Full HRMS spectrum of compound 10.....                                         | 22        |
| Figure S29. HR-MS/MS spectrum of compound 10.....                                          | 22        |

|                                                                  |           |
|------------------------------------------------------------------|-----------|
| Figure S30. $^1\text{H}$ spectrum of compound <b>10</b> .....    | 23        |
| Figure S31. $^{13}\text{C}$ spectrum of compound <b>10</b> ..... | 23        |
| <b>NMR and MS spectra and spectral data of compound 11</b> ..... | <b>24</b> |
| Figure S32. Full HRMS spectrum of compound <b>11</b> .....       | 24        |
| Figure S33. HR-MS/MS spectrum of compound <b>11</b> .....        | 24        |
| Table S3. NMR assignments of compound <b>11</b> .....            | 25        |
| Figure S34. $^1\text{H}$ spectrum of compound <b>11</b> .....    | 26        |
| Figure S35. $^{13}\text{C}$ spectrum of compound <b>11</b> ..... | 26        |
| <b>NMR and MS spectra and spectral data of compound 12</b> ..... | <b>27</b> |
| Figure S36. Full HRMS spectrum of compound <b>12</b> .....       | 27        |
| Figure S37. HR-MS/MS spectrum of compound <b>12</b> .....        | 27        |
| Figure S38. $^1\text{H}$ spectrum of compound <b>12</b> .....    | 28        |
| Figure S39. $^{13}\text{C}$ spectrum of compound <b>12</b> ..... | 28        |

## NMR and MS Spectra and Spectral Data of Compound 1

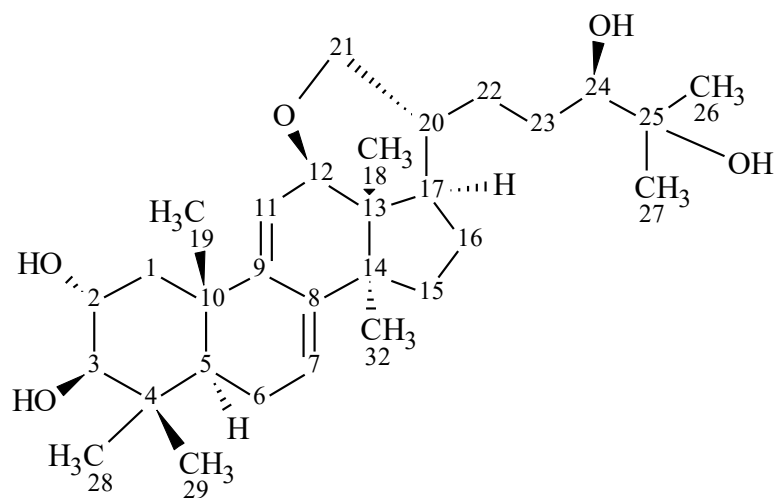

HRMS:  $(2M+2Na)/2=511.33967$  ( $\delta=0.5$  ppm;  $C_{60}H_{96}O_{10}Na_2/z=2/$ ). HR-ESI-MS-MS (CID=55%; rel. int. %): 571(100); 553(28); 535(6); 499(14); 471(10); 453(70).

ku66202\_hysub-viii\_t25073 #1-30 RT: 0.00-0.25 AV: 30 NL: 9.12E6  
T: FTMS + c ESI Full ms [100.00-1050.00]

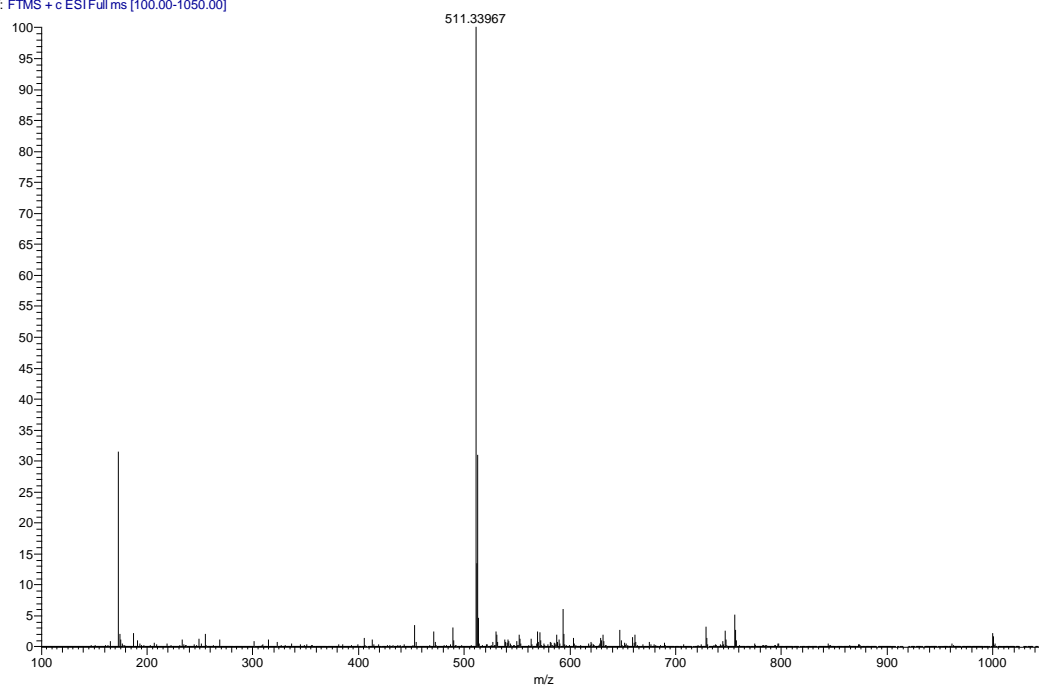

Figure S1. Full HRMS spectrum of compound 1.

ku66202\_hsub-viii\_f125075 #1-30 RT: 0.00-0.33 AV: 30 NL: 5.17E4  
T: FTMS + c ESI Full ms2 511.00@cid55.00 [140.00-800.00]

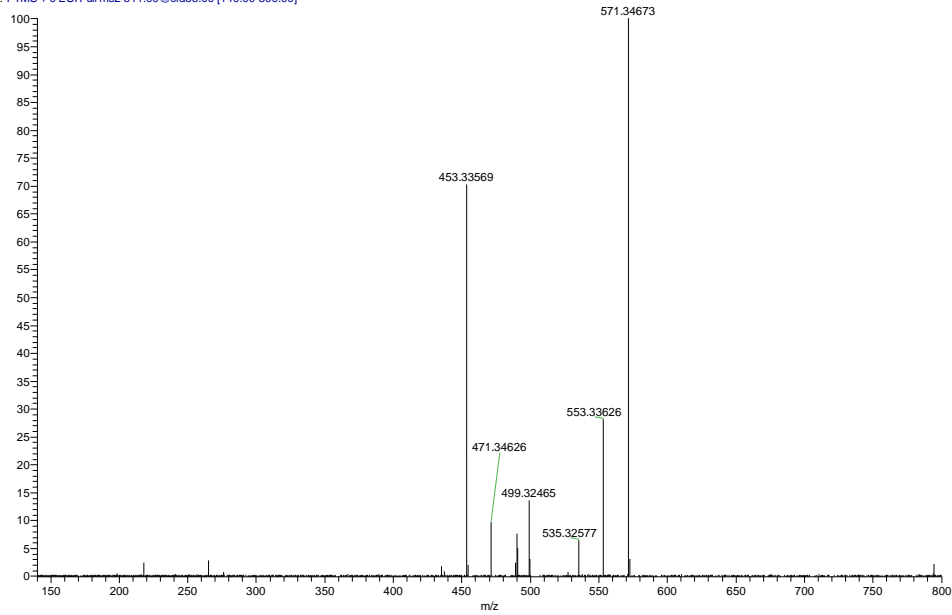

Figure S2. HR-MS/MS spectrum of compound 1.

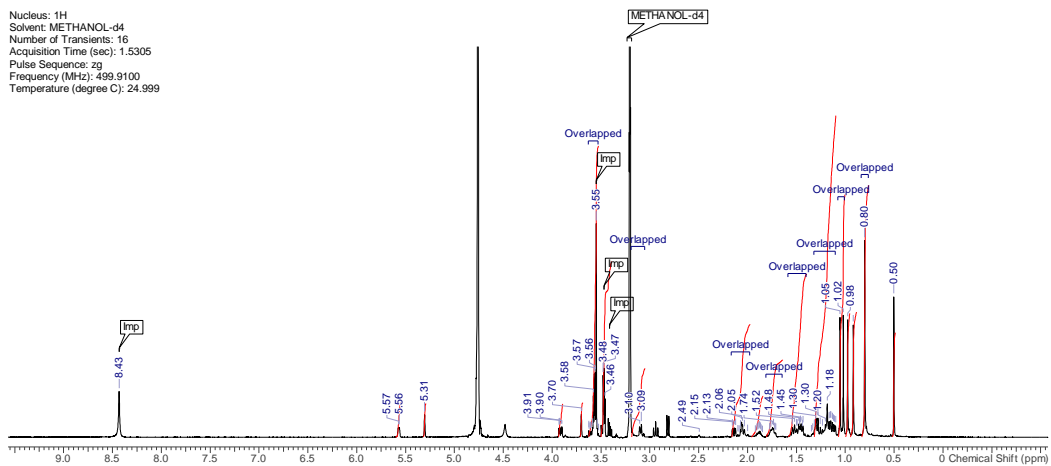

Figure S3. The <sup>1</sup>H NMR spectrum of compound 1.

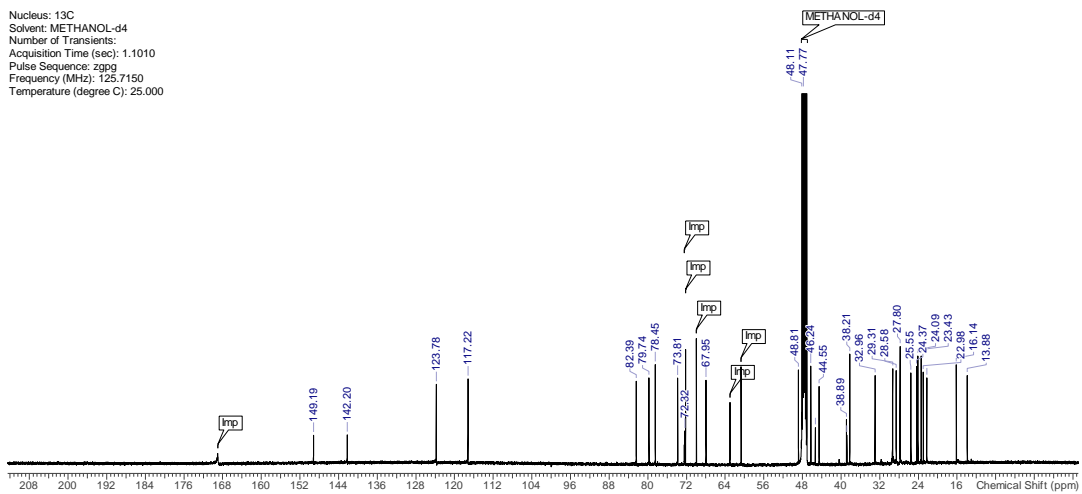

Figure S4. The <sup>13</sup>C NMR spectrum of compound 1.

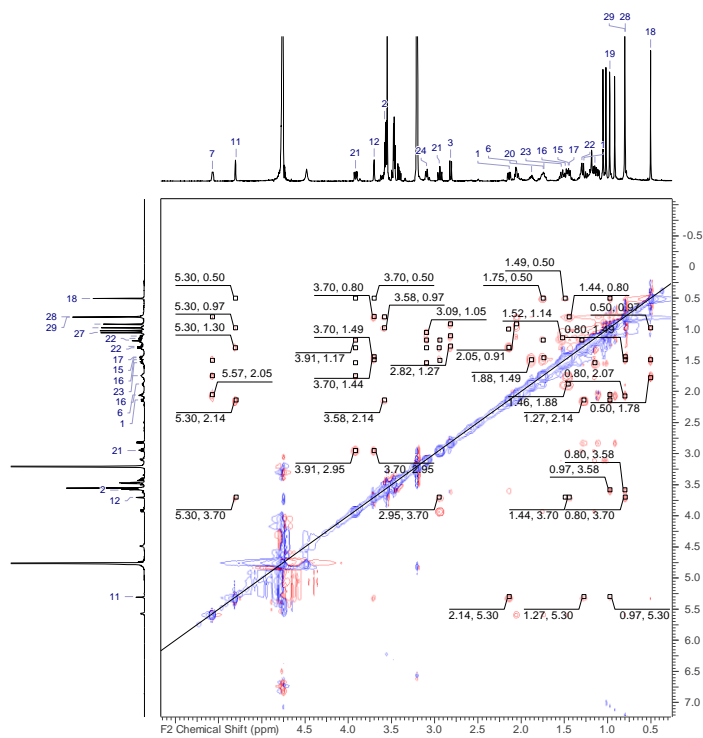

Figure S5. ROESY spectrum of compound 1.

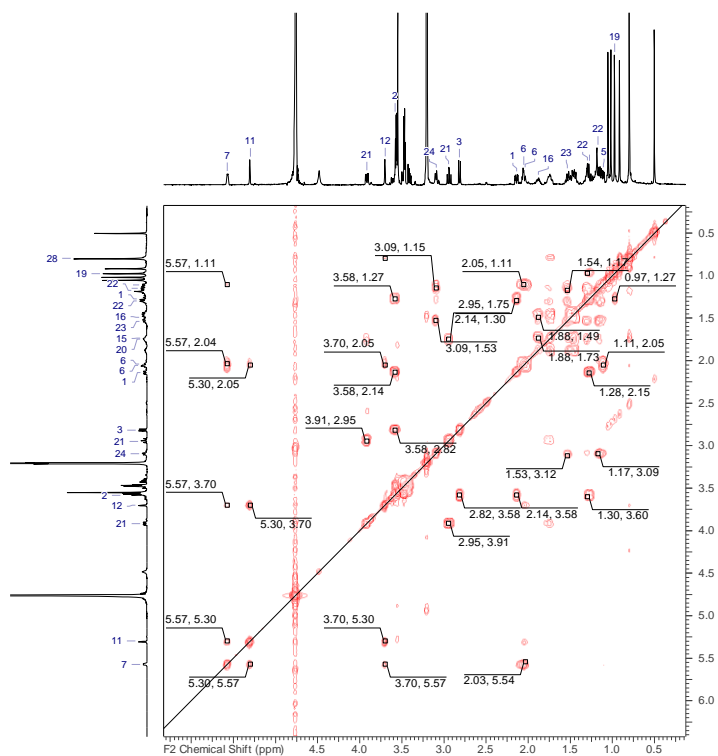

Figure S6. COSY spectrum of compound 1.



## NMR and MS Spectra and Spectral Data of Compound 2

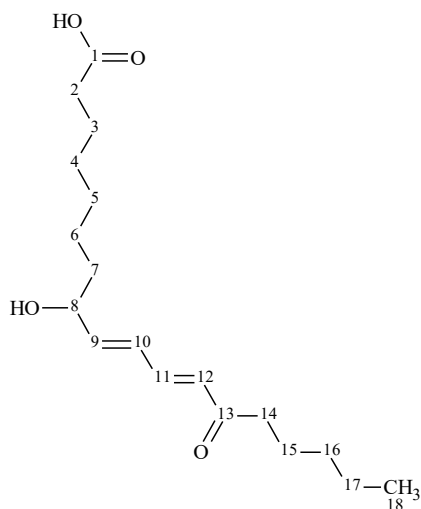

HRMS: M-H=309.20673 ( $\delta$ =-1.3 ppm; C<sub>18</sub>H<sub>29</sub>O<sub>4</sub>). HR-ESI-MS-MS (CID=55%; rel. int. %): 291(100); 209(8); 195(21); 171(4).

ku66204\_hysub-x\_ft25115 #1-30 RT: 0.00-0.27 AV: 30 NL: 9.19E6  
T: FTMS - c ESI Full ms [100.00-900.00]

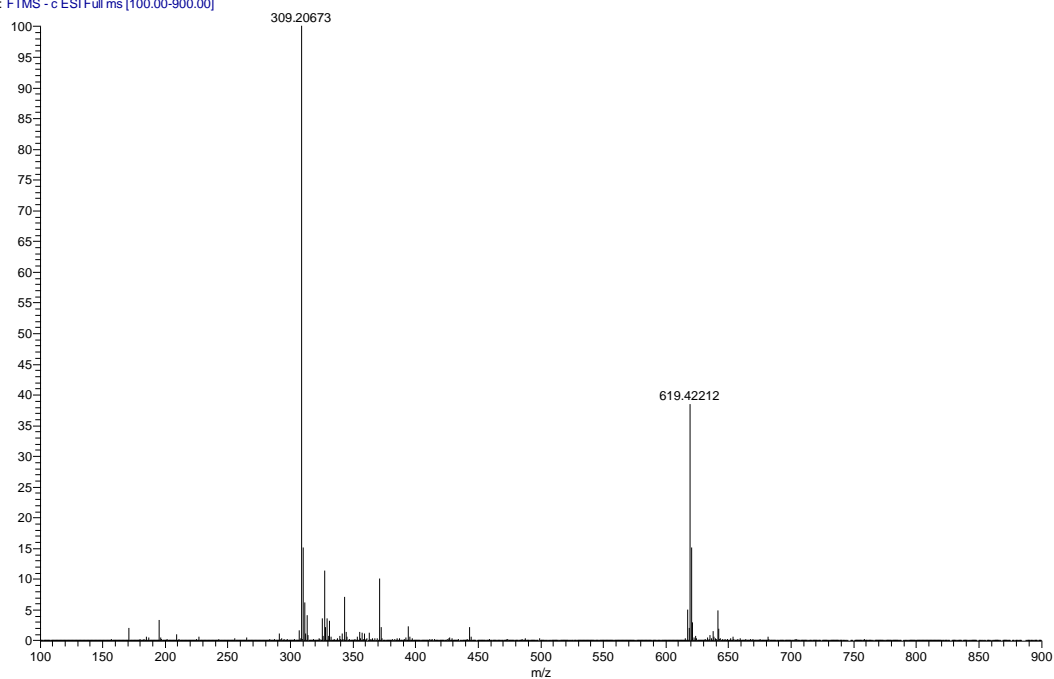

Figure S9. Full HRMS spectrum of compound 2.



ku66204\_hysub-x\_ft25117 #1-30 RT: 0.00-0.33 AV: 30 NL: 1.05E7  
T: FTMS - c ESI Full ms2 309.21@cid55.00 [85.00-330.00]

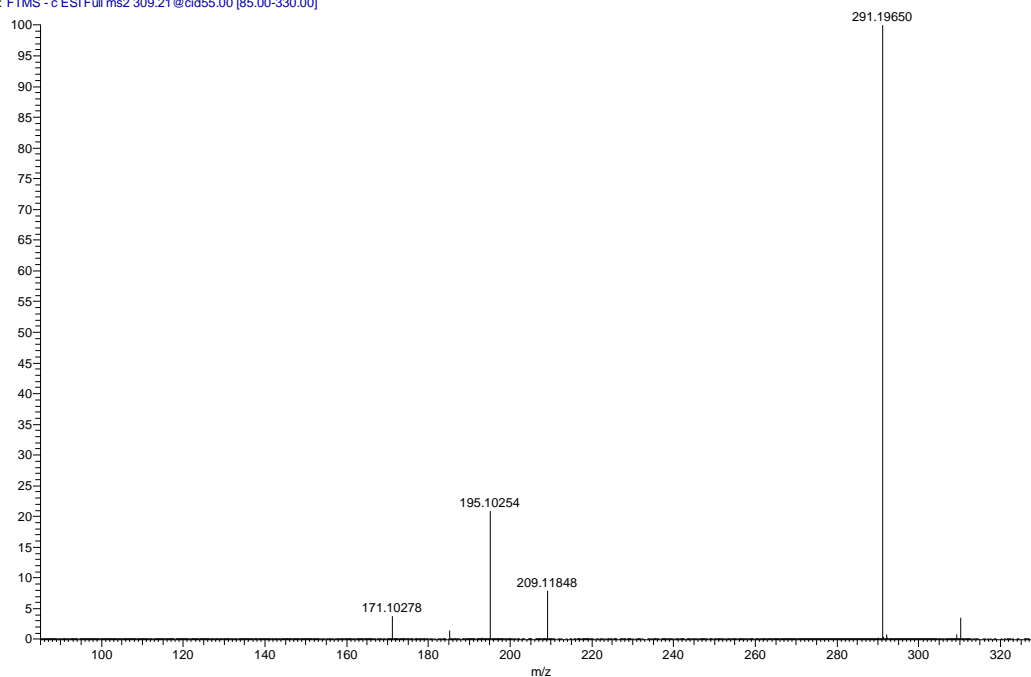

Figure S10. HR-MS/MS spectrum of compound 2.

Nucleus: 1H  
Solvent: METHANOL-d4  
Number of Transients: 16  
Acquisition Time (sec): 3.9998  
Pulse Sequence: zg  
Frequency (MHz): 499.9100  
Temperature (degree C): 24.998

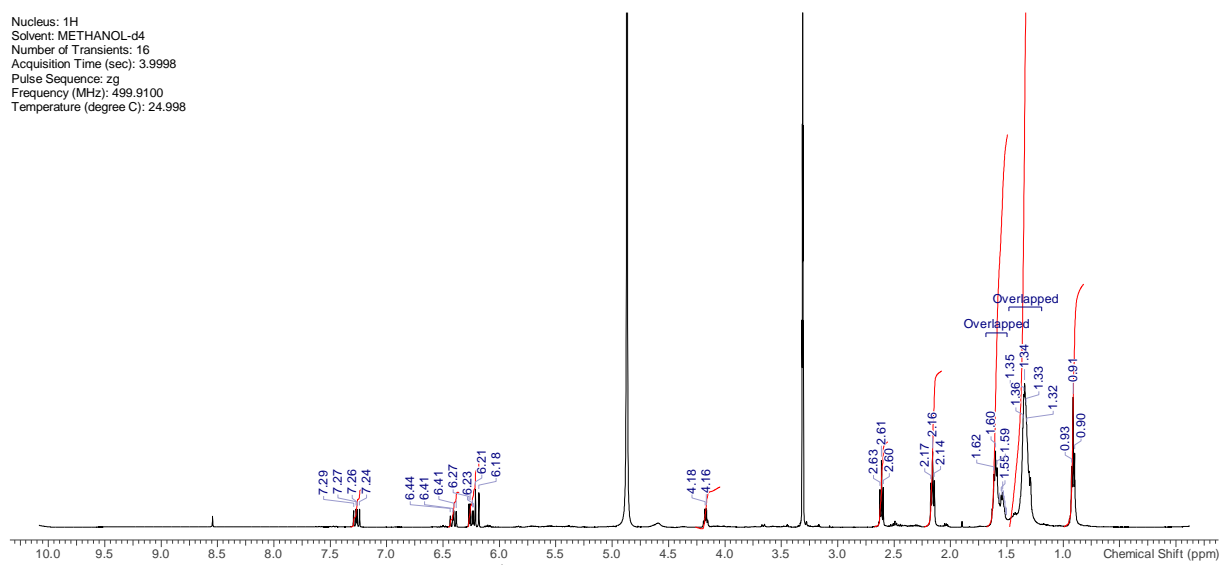

Figure S11. The <sup>1</sup>H NMR spectrum of compound 2.

Nucleus:  $^{13}\text{C}$   
Solvent: METHANOL- $d_4$   
Number of Transients: 258  
Acquisition Time (sec): 1.1010  
Pulse Sequence: zgpg  
Frequency (MHz): 125.7023  
Temperature (degree C): 25.000

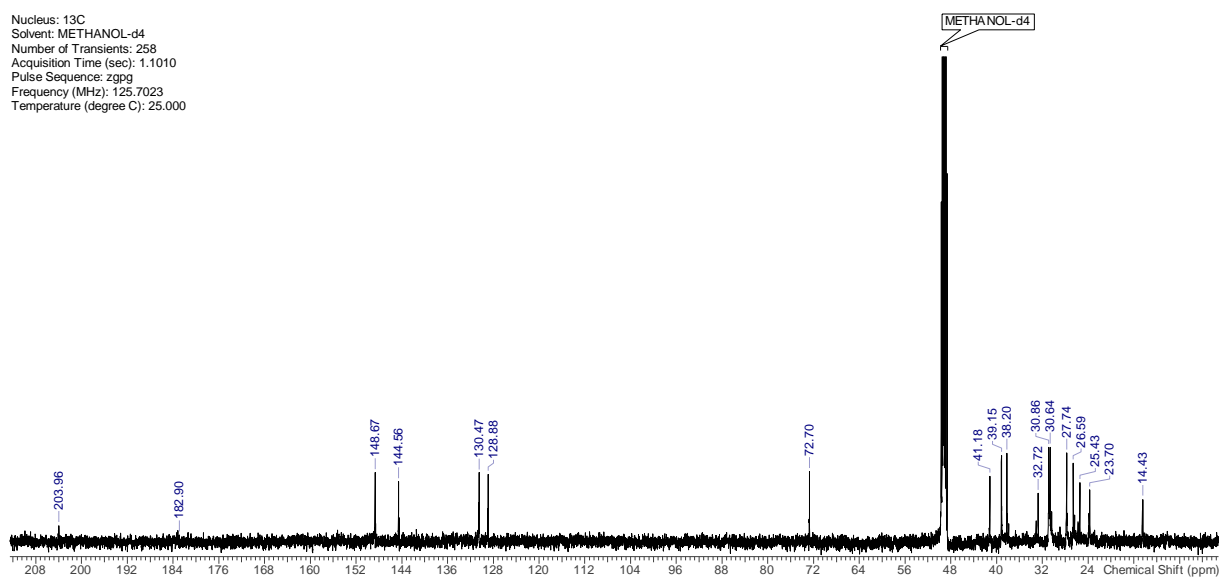

Figure S12. The  $^{13}\text{C}$  NMR spectrum of compound **2**.

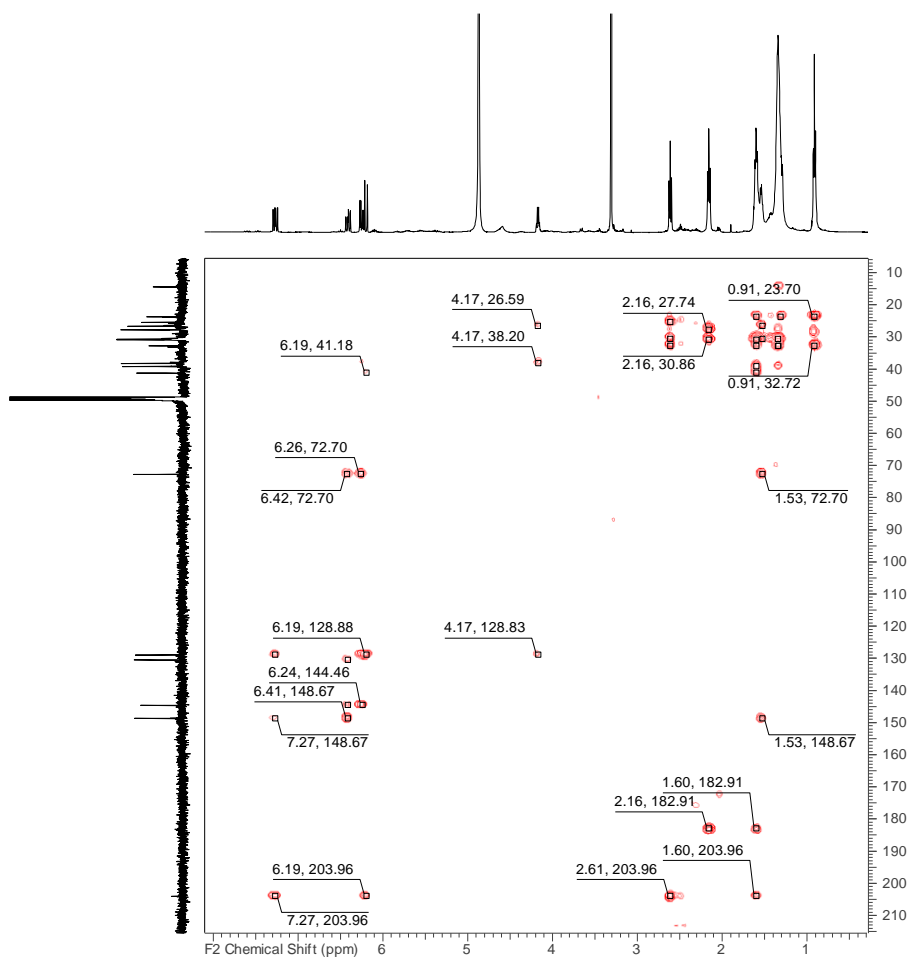

Figure S13. HMBC spectrum of compound **2**.

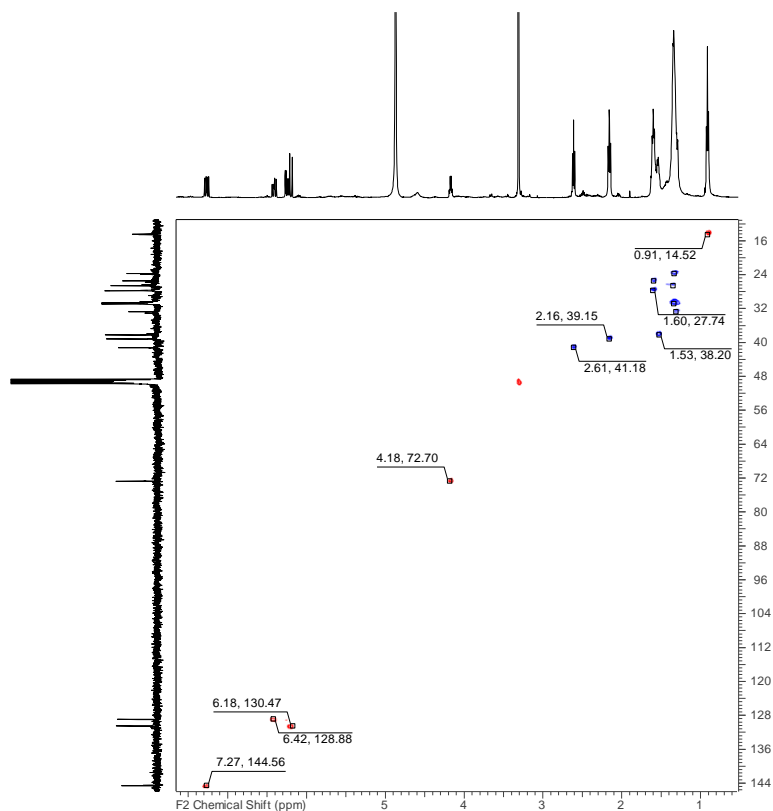

Figure S14. HSQC spectrum of compound **2**.

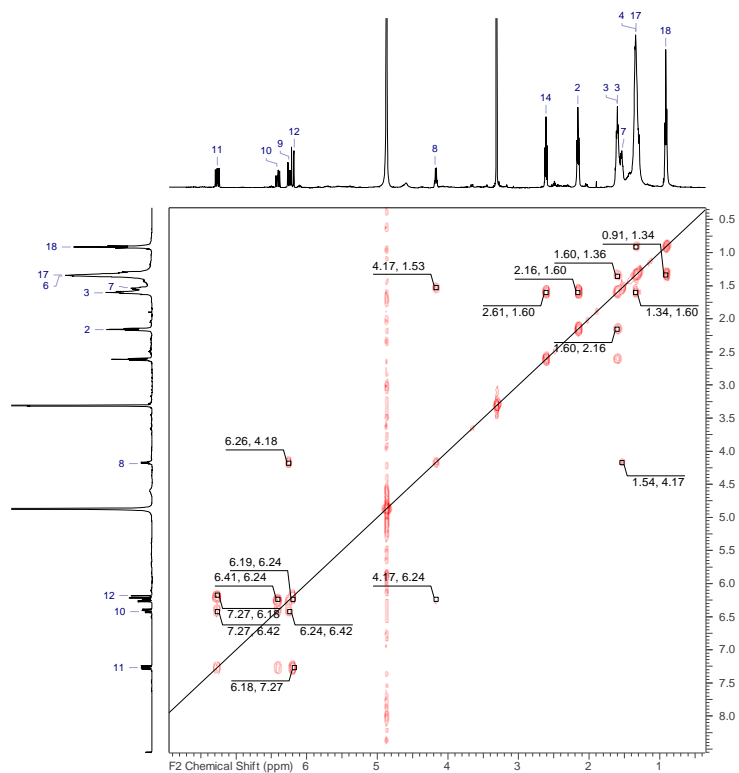

Figure S15. COSY spectrum of compound **2**.

## NMR and MS Spectra and Spectral Data of Compound 5

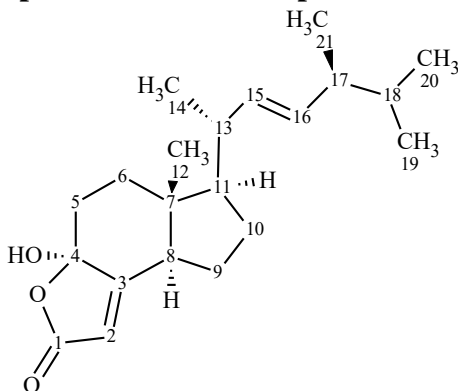

HRMS:  $M+H=333.24277$  ( $\delta=1.0$  ppm;  $C_{21}H_{33}O_3$ ). HR-ESI-MS-MS (CID=45%; rel. int. %):  
315(100).

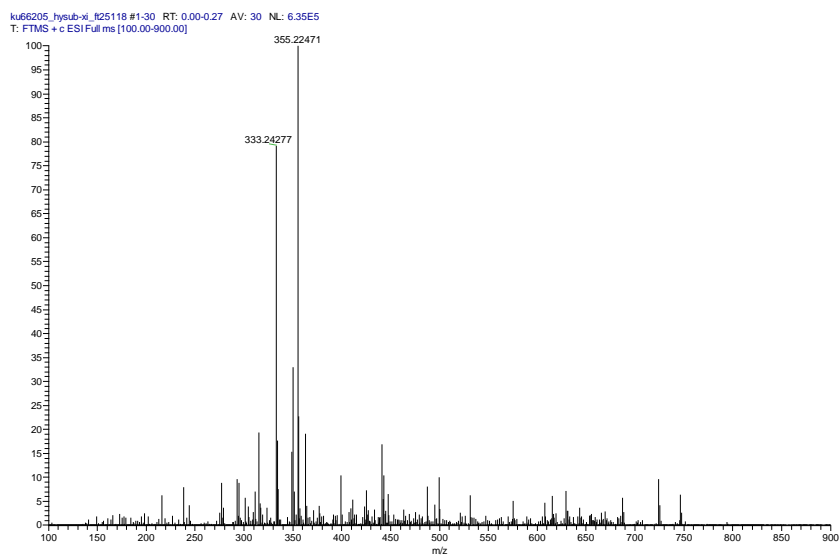

Figure S16. Full HRMS spectrum of compound 5.

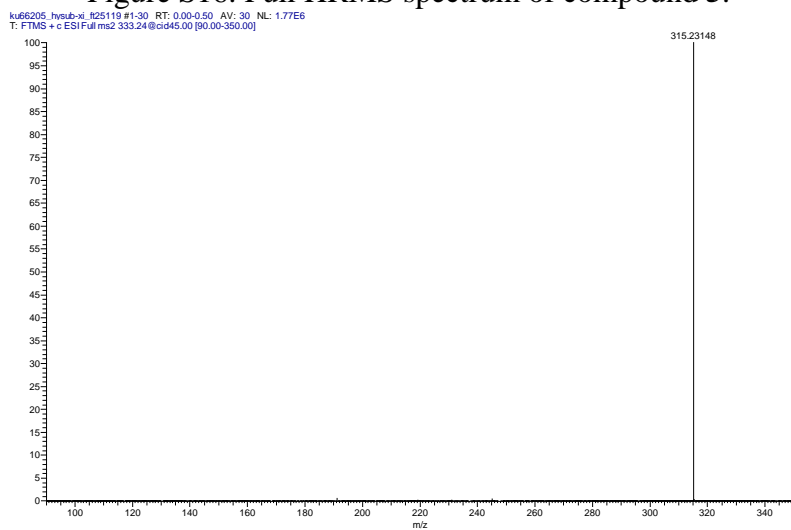

Figure S17. HR-MS/MS spectrum of compound 5.

Table S1. The <sup>1</sup>H and <sup>13</sup>C NMR assignments of compound **5**.

| Atom# | C Shift | H Shift | multiplicity (J in Hz) |
|-------|---------|---------|------------------------|
| 1     | 173.8   | -       | -                      |
| 2     | 112.7   | 5.68    | d (1.8)                |
| 3     | 173.3   | -       | -                      |
| 4     | 107.3   | -       | -                      |
| 5     | 36.3    | 1.80    | td (13.6, 4.8)         |
| 5     | 36.3    | 2.23    | ddd (13.6, 4.1, 2.7)   |
| 6     | 36.6    | 1.61    | m                      |
| 6     | 36.6    | 1.97    | m                      |
| 7     | 50.0    | -       | -                      |
| 8     | 51.9    | 2.66    | ddd (12.4, 7.1, 1.6)   |
| 9     | 22.4    | 1.72    | m                      |
| 9     | 22.4    | 1.60    | m                      |
| 10    | 30.2    | 1.93    | m                      |
| 10    | 30.2    | 1.50    | m                      |
| 11    | 56.9    | 1.52    | m                      |
| 12    | 12.2    | 0.65    | s                      |
| 13    | 41.7    | 2.09    | m                      |
| 14    | 21.7    | 1.06    | d (6.64)               |
| 15    | 136.6   | 5.22    | dd (15.2, 8.5)         |
| 16    | 134.0   | 5.29    | dd (15.4, 7.6)         |
| 17    | 44.5    | 1.87    | m                      |
| 18    | 34.5    | 1.49    | m                      |
| 19    | 20.6    | 0.87    | d (6.8)                |
| 20    | 20.2    | 0.85    | d (6.8)                |
| 21    | 18.3    | 0.95    | d (6.8)                |

Nucleus: 1H  
Solvent: METHANOL-d4  
Number of Transients: 16  
Acquisition Time (sec): 3.9999  
Pulse Sequence: zg  
Frequency (MHz): 499.9100  
Temperature (degree C): 25.000

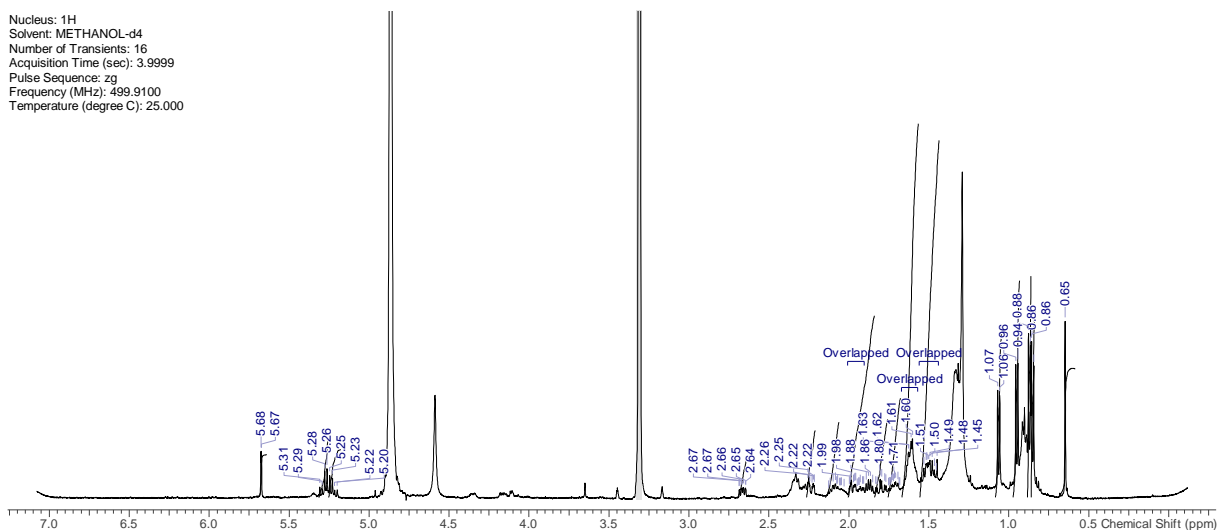

Figure S18. The  $^1\text{H}$  spectrum of compound 5.

Nucleus: 13C  
Solvent: METHANOL-d4  
Number of Transients: 3814  
Acquisition Time (sec): 1.1010  
Pulse Sequence: zgpg  
Frequency (MHz): 125.7023  
Temperature (degree C): 25.000

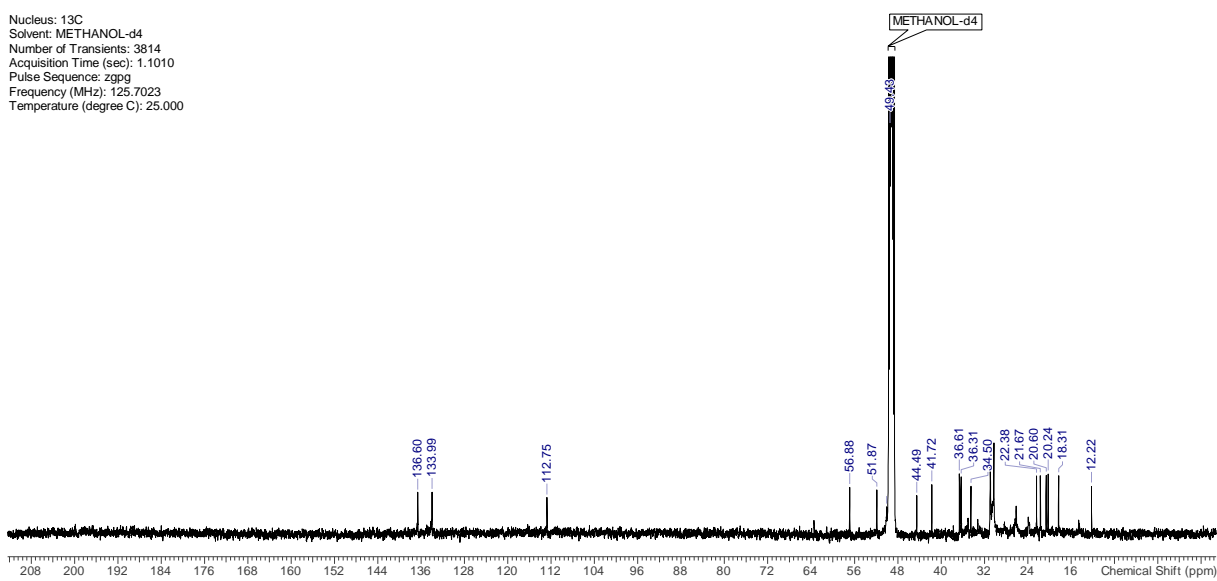

Figure S19. The  $^{13}\text{C}$  spectrum of compound 5.

## NMR and MS Spectra and Spectral Data of Compounds 8, 9, and 10

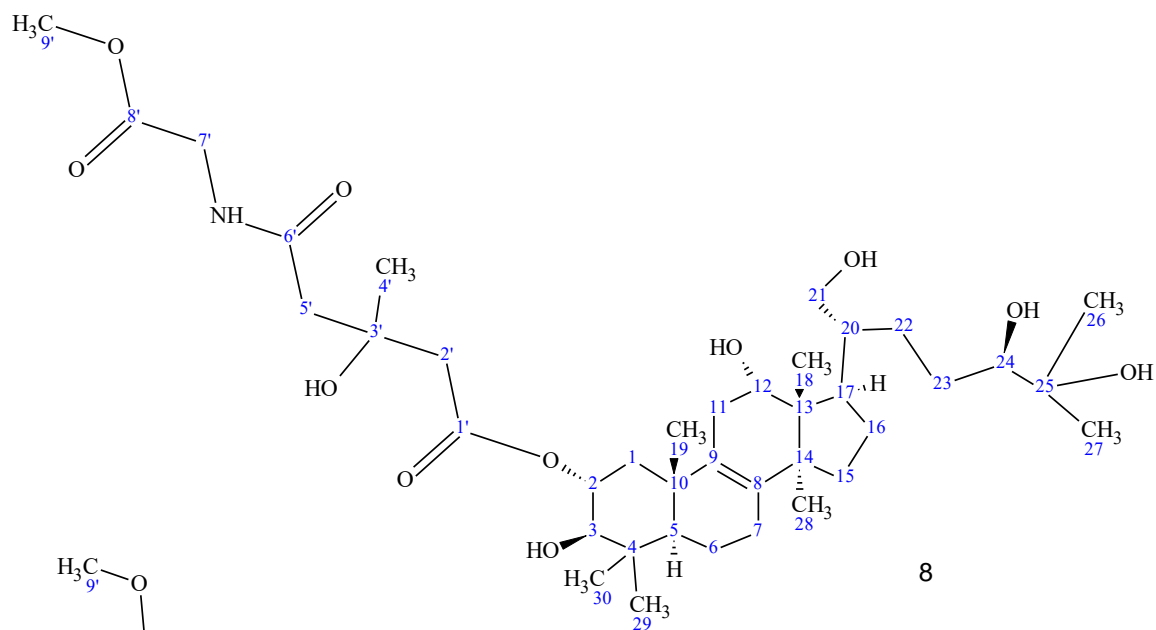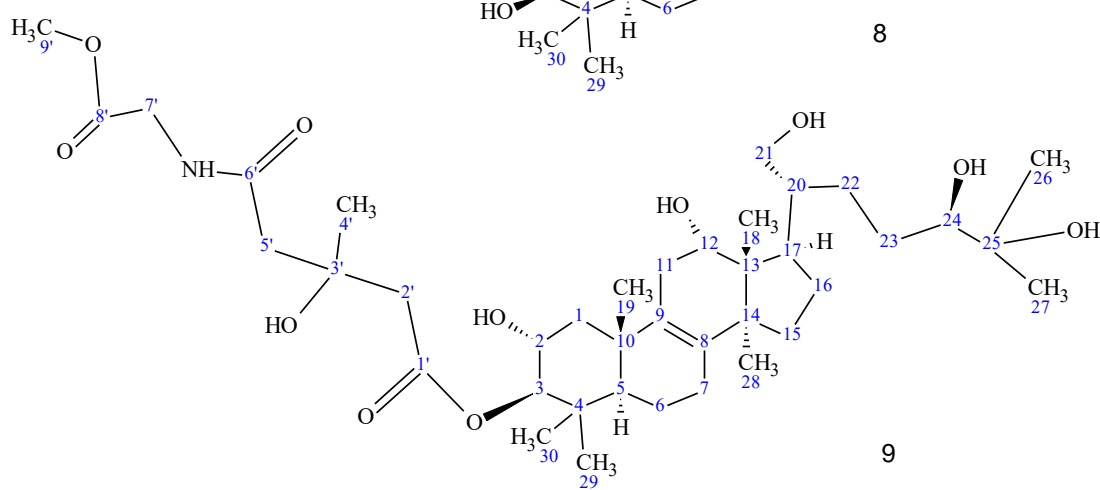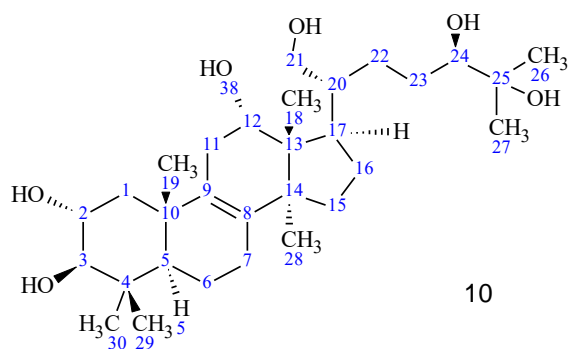

Table S2. The  $^1\text{H}$  and  $^{13}\text{C}$  NMR assignments of compounds **8**, **9**, and **10**

| Trivial Name | Compound <b>9</b> |          |         |                        |                | Compound <b>8</b> |                        |                       | Compound <b>10</b> |                        |                      |
|--------------|-------------------|----------|---------|------------------------|----------------|-------------------|------------------------|-----------------------|--------------------|------------------------|----------------------|
|              | Atom#             | C Shift  | H Shift | Multiplicity (J in Hz) | C Shift        | H Shift           | Multiplicity (J in Hz) | C Shift               | H Shift            | Multiplicity (J in Hz) |                      |
|              | 1                 | $\beta$  | 44.9    | 2.12                   | m              | 41.9              | 2.11                   | dd (12.3, 4.4)        | 45.0               | 2.05                   | m                    |
|              | 1                 | $\alpha$ | 44.9    | 1.26                   | m              | 41.9              | 1.24                   | m                     | 45.0               | 1.16                   | m                    |
|              | 2                 |          | 68.2    | 3.83                   | m              | 74.5              | 5.03                   | ddd (11.7, 10.1, 4.4) | 70.0               | 3.64                   | ddd (11.6, 9.7, 4.4) |
|              | 3                 |          | 86.0    | 4.58                   | d (9.9)        | 81.0              | 3.21                   | d (10.1)              | 84.4               | 2.93                   | d (9.7)              |
|              | 4                 |          | 40.2    | -                      | -              | 40.8              | -                      | -                     | 40.5               | -                      |                      |
|              | 5                 |          | 52.0    | 1.27                   | m              | 52.0              | 1.21                   | m                     | 52.1               | 1.16                   | m                    |
|              | 6                 | $\alpha$ | 19.4    | 1.58                   | m              | 19.4              | 1.76                   | m                     | 19.5               | 1.73                   | m                    |
|              | 6                 | $\beta$  | 19.4    | 1.74                   | m              | 19.4              | 1.58                   | m                     | 19.5               | 1.56                   | m                    |
|              | 7                 |          | 27.6    |                        |                | 27.7              | 2.13                   | m                     | 27.7               | 2.10                   | m                    |
|              | 7                 |          | 27.6    | 2.12                   | m              | 27.7              | 2.07                   | m                     | 27.7               |                        |                      |
|              | 8                 |          | 136.7   |                        |                | 136.8             |                        |                       | 136.5              |                        |                      |
|              | 9                 |          | 134.2   |                        |                | 134.0             |                        |                       | 134.5              |                        |                      |
|              | 10                |          | 39.3    |                        |                | 39.4              |                        |                       | 39.3               |                        |                      |
|              | 11                | $\beta$  | 33.4    | 2.76                   | m              | 33.3              | 2.71                   | m                     | 33.4               | 2.03                   | m                    |
|              | 11                | $\alpha$ | 33.4    | 2.05                   | m              | 33.3              | 1.96                   | m                     | 33.4               | 2.75                   | m                    |
|              | 12                |          | 74.5    | 4.03                   | d (8.1)        | 74.4              | 4.01                   | dd (8.9, 1.3)         | 74.5               | 4.02                   | d (7.8)              |
|              | 13                |          | 51.2    |                        |                | 51.3              |                        |                       | 51.4               |                        |                      |
|              | 14                |          | 51.4    |                        |                | 51.2              |                        |                       | 51.2               |                        |                      |
|              | 15                | $\alpha$ | 33.0    | 1.77                   | m              | 33.0              | 1.21                   | m                     | 33.0               | 1.21                   | m                    |
|              | 15                | $\beta$  | 33.0    | 1.22                   | m              | 33.0              | 1.75                   | m                     | 33.0               | 1.76                   | m                    |
|              | 16                | $\beta$  | 29.0    | 1.46                   | m              | 29.0              | 2.08                   | m                     | 29.0               | 1.44                   | m                    |
|              | 16                | $\alpha$ | 29.0    | 2.10                   | m              | 29.0              | 1.42                   | m                     | 29.0               | 2.10                   | m                    |
|              | 17                |          | 39.4    | 2.44                   | q(9.8)         | 39.3              | 2.43                   | q (9.6)               | 39.4               | 2.44                   | q (9.6)              |
|              | 18                |          | 17.5    | 0.65                   | s              | 17.5              | 0.64                   | s                     | 17.5               | 0.65                   | s                    |
|              | 19                |          | 20.5    | 1.09                   | s              | 20.3              | 1.12                   | s                     | 20.5               | 1.06                   | s                    |
|              | 20                |          | 44.4    | 1.40                   | m              | 44.4              | 1.39                   | m                     | 44.4               | 1.38                   | m                    |
|              | 21                |          | 62.1    | 3.72                   | m              | 62.0              | 3.70                   | m                     | 62.1               | 3.71                   | m                    |
|              | 21                |          | 62.1    | 3.80                   | m              | 62.0              | 3.79                   | dd (11.6, 2.6)        | 62.1               | 3.79                   | dd (11.3, 2.5)       |
|              | 22                |          | 28.2    | 1.46                   | m              | 28.2              | 1.45                   | m                     | 28.2               | 1.43                   | m                    |
|              | 22                |          | 28.2    | 1.68                   | m              | 28.2              | 1.67                   | m                     | 28.2               | 1.69                   | m                    |
|              | 23                |          | 29.5    | 1.42                   | m              | 29.5              | 1.42                   | m                     | 29.5               | 1.43                   | m                    |
|              | 23                |          | 29.5    | 1.56                   | m              | 29.5              | 1.56                   | m                     | 29.5               | 1.56                   | m                    |
|              | 24                |          | 79.5    | 3.26                   | dd (10.1, 1.8) | 79.5              | 3.26                   | dd (10.3, 1.7)        | 79.6               | 3.26                   | dd (10.0, 1.7)       |
|              | 25                |          | 74.0    |                        |                | 74.0              |                        |                       | 74.0               |                        |                      |
|              | 26                |          | 25.0    | 1.14                   | s              | 25.0              | 1.14                   | s                     | 25.0               | 1.14                   | s                    |
|              | 27                |          | 25.9    | 1.17                   | s              | 25.9              | 1.17                   | s                     | 25.9               | 1.17                   | s                    |
|              | 28                |          | 24.3    | 1.09                   | s              | 24.3              | 1.07                   | m                     | 24.3               | 1.07                   | s                    |
|              | 29                |          | 18.1    | 0.92                   | s              | 17.3              | 0.89                   | s                     | 17.4               | 0.84                   | s                    |
|              | 30                |          | 29.2    | 0.92                   | s              | 29.1              | 1.07                   | s                     | 29.2               | 1.03                   | s                    |
|              | 1'                |          | 173.3   |                        |                | 172.8             |                        |                       |                    |                        |                      |
|              | 2'                |          | 47.0    | 2.74                   | s              | 47.2              | 2.68                   | AB                    |                    |                        |                      |
|              | 3'                |          | 71.7    |                        |                | 71.6              |                        |                       |                    |                        |                      |



|    |       |      |    |       |      |    |
|----|-------|------|----|-------|------|----|
| 4' | 28.1  | 1.42 | s  | 28.1  | 1.40 | s  |
| 5' | 47.4  | 2.60 | s  | 47.3  | 2.60 | s  |
| 6' | 174.2 |      |    | 174.2 |      |    |
| 7' | 172.0 |      |    | 42.0  | 3.97 | AB |
| 8' | 41.9  | 3.97 | AB | 172.0 |      |    |
| 9' | 52.8  | 3.73 | s  | 52.8  | 3.73 | s  |

### NMR and MS Spectra and Spectral Data of Compound **8**

HRMS: M+H=724.46289 (delta=-0.2 ppm; C<sub>39</sub>H<sub>66</sub>O<sub>11</sub>N). HR-ESI-MS-MS (CID=35%; rel. int. %): 706(100); 688(31); 670(40); 652(7); 634(2).

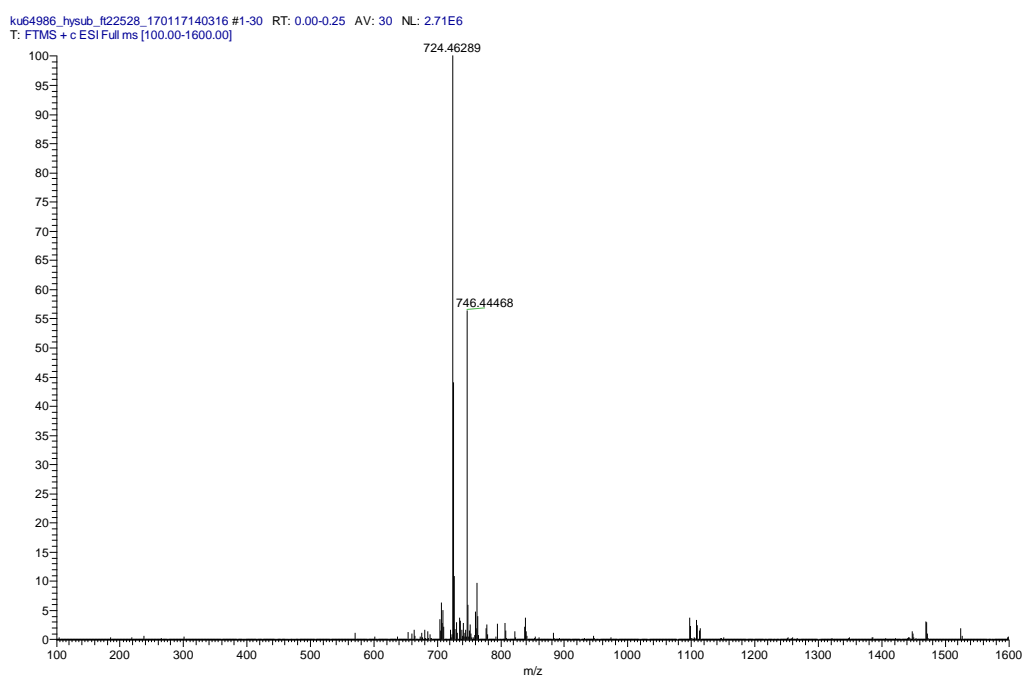

Figure S20. Full HRMS spectrum of compound **8**.

ku64986\_hysub\_f122529 #1-30 RT: 0.00-0.32 AV: 30 NL: 2.40E6  
T: FTMS + c ESI Full ms2 724.46@cid35.00 [195.00-750.00]

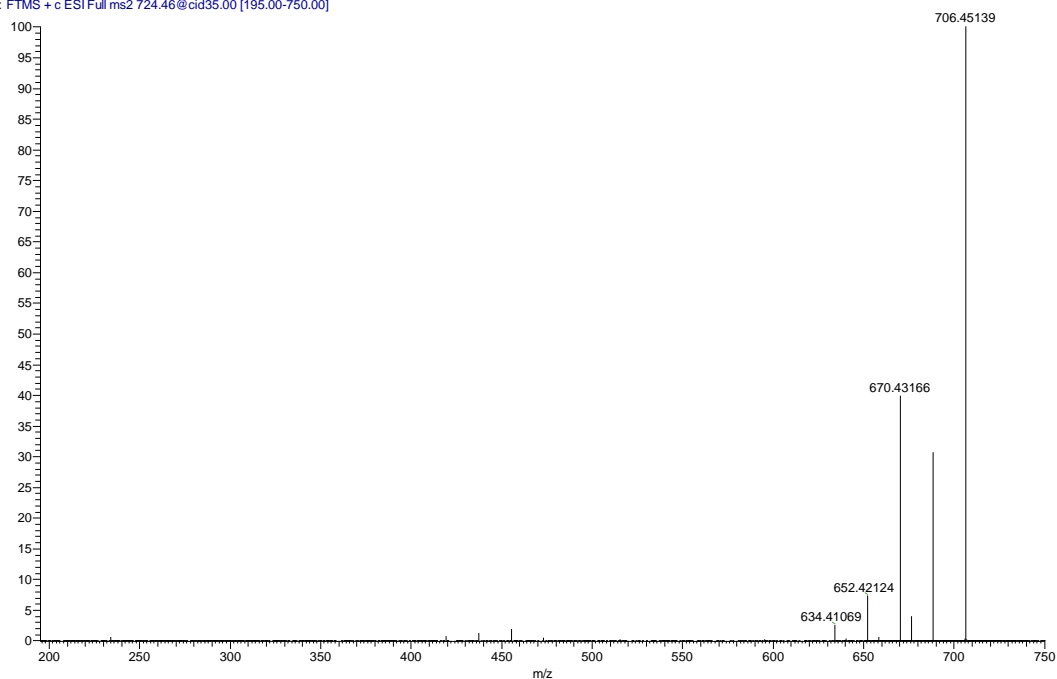

Figure S21. HR-MS/MS spectrum of compound 8.

Nucleus: 1H  
Solvent: METHANOL-d4  
Number of Transients: 8  
Acquisition Time (sec): 5.0000  
Pulse Sequence: s2pul  
Frequency (MHz): 799.7036  
Temperature (degree C): 25.000

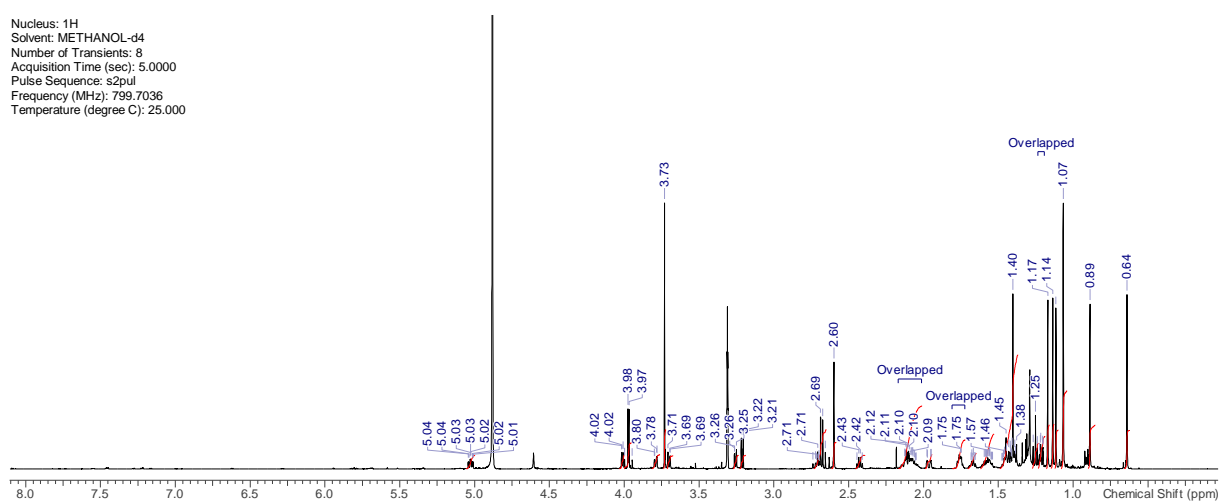

Figure S22. The <sup>1</sup>H spectrum of compound 8.

Nucleus:  $^{13}\text{C}$   
Solvent: METHANOL-d4  
Number of Transients: 128  
Acquisition Time (sec): 0.6554  
Pulse Sequence: s2pul  
Frequency (MHz): 201.1066  
Temperature (degree C): 25.000

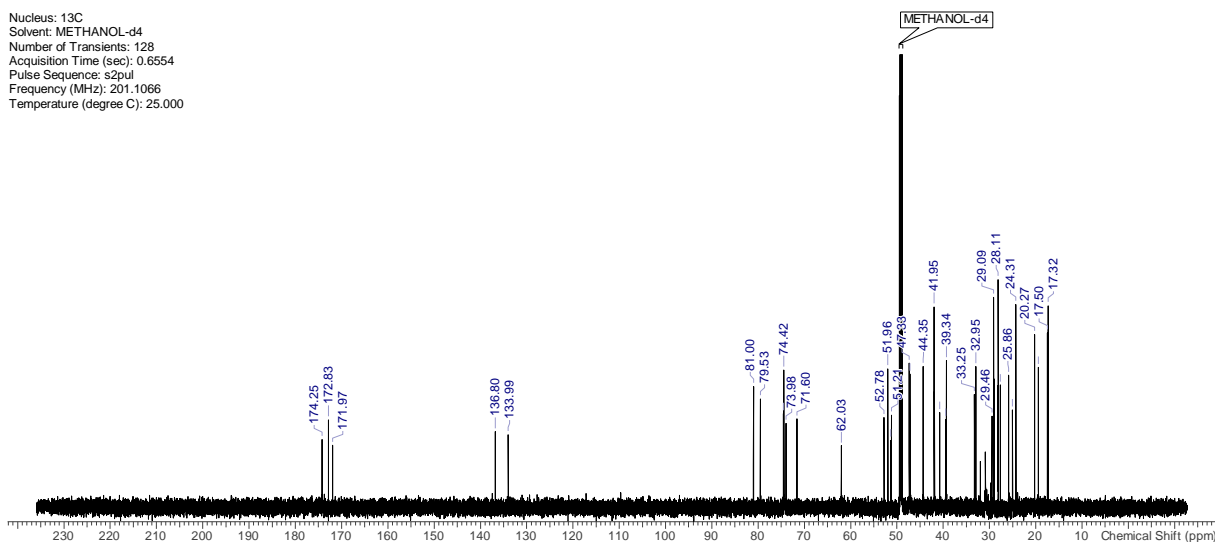

Figure S23. The  $^{13}\text{C}$  NMR spectrum of compound **8**.

### NMR and MS Spectra and Spectral Data of Compound **9**

HRMS:  $\text{M}+\text{H}=724.46357$  ( $\delta=0.7$  ppm;  $\text{C}_{39}\text{H}_{66}\text{O}_{11}\text{N}$ ). HR-ESI-MS-MS (CID=45%; rel. int. %): 688(100); 670(41); 652(10); 473(22); 455(33); 437(40); 419(25); 234(6).

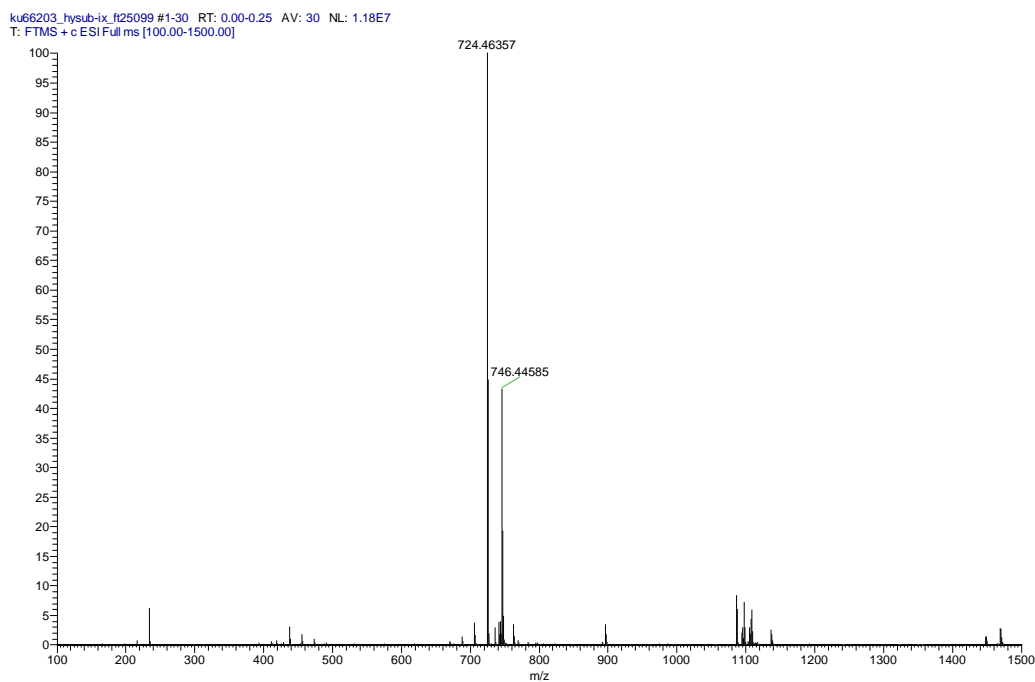

Figure S24. Full HRMS spectrum of compound **9**.

ku66203\_hysub-ix\_f125100 #1-30 RT: 0.00-0.34 AV: 30 NL: 1.68E6  
T: FTMS + c ESI Full ms2 724.46@cid45.00 [195.00-750.00]

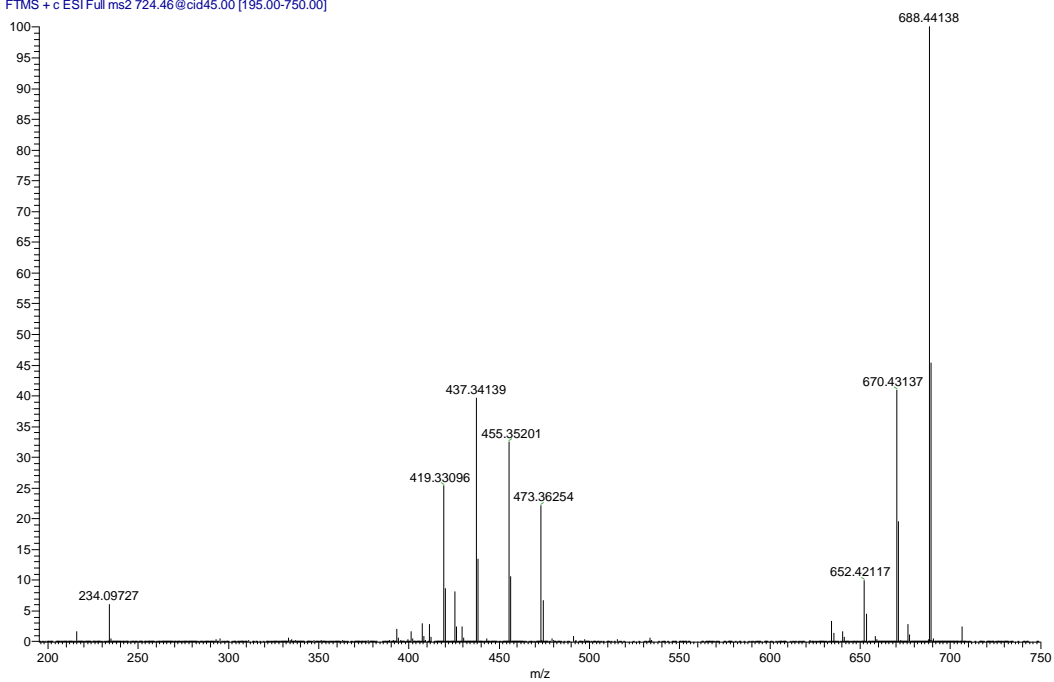

Figure S25. HR-MS/MS spectrum of compound 9.

Nucleus: 1H  
Solvent: METHANOL-d4  
Number of Transients: 16  
Acquisition Time (sec): 1.6393  
Pulse Sequence: zg  
Frequency (MHz): 499.9100  
Temperature (degree C): 25.002

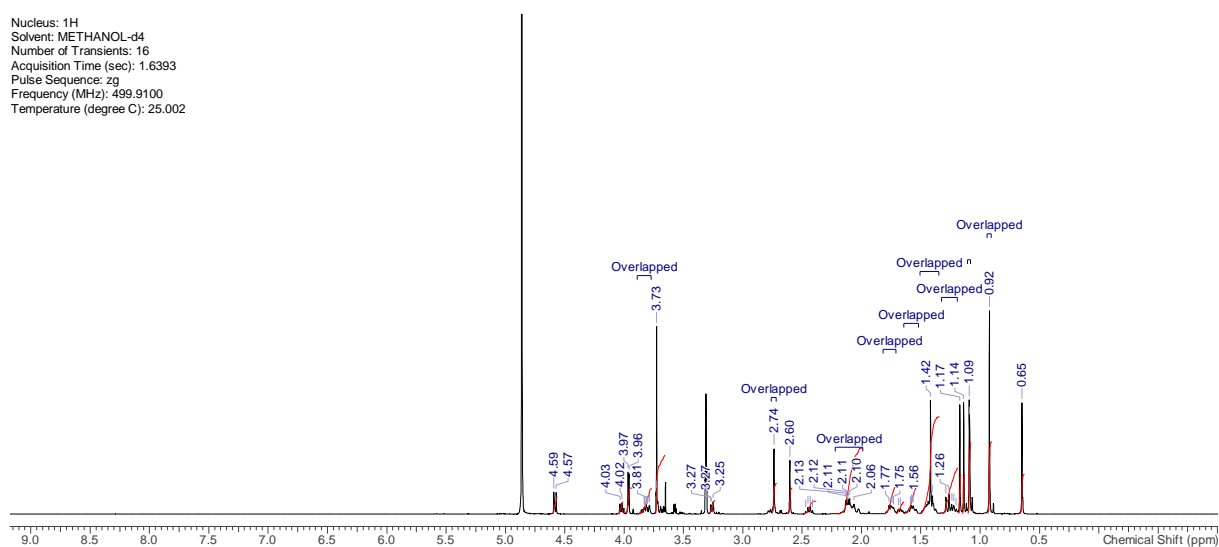

Figure S26. The <sup>1</sup>H spectrum of compound 9.

Nucleus:  $^{13}\text{C}$   
Solvent: METHANOL- $d_4$   
Number of Transients: 512  
Acquisition Time (sec): 1.1010  
Pulse Sequence: zgpg  
Frequency (MHz): 125.7023  
Temperature (degree C): 24.998

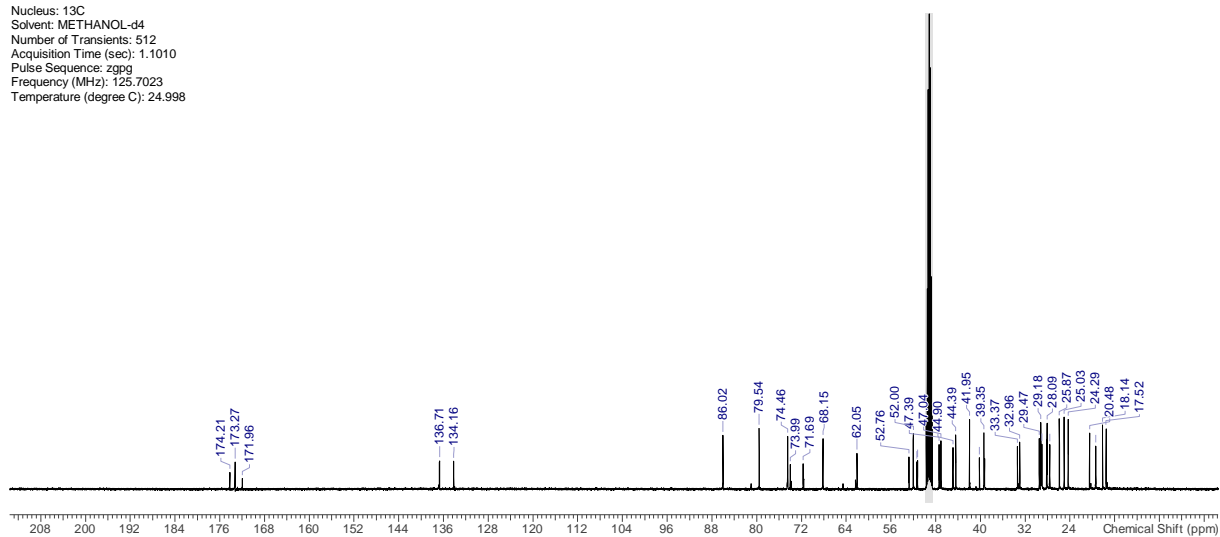

Figure S27. The  $^{13}\text{C}$  spectrum of compound **9**.

## NMR and MS Spectra and Spectral Data of Compound **10**

HRMS: M+H=509.38356 ( $\delta=-0.2$  ppm;  $C_{30}H_{53}O_6$ ). HR-ESI-MS-MS (CID=35%; rel. int. %): 491(22); 473(100); 461(19); 455(94); 443(5); 437(15); 419(4).

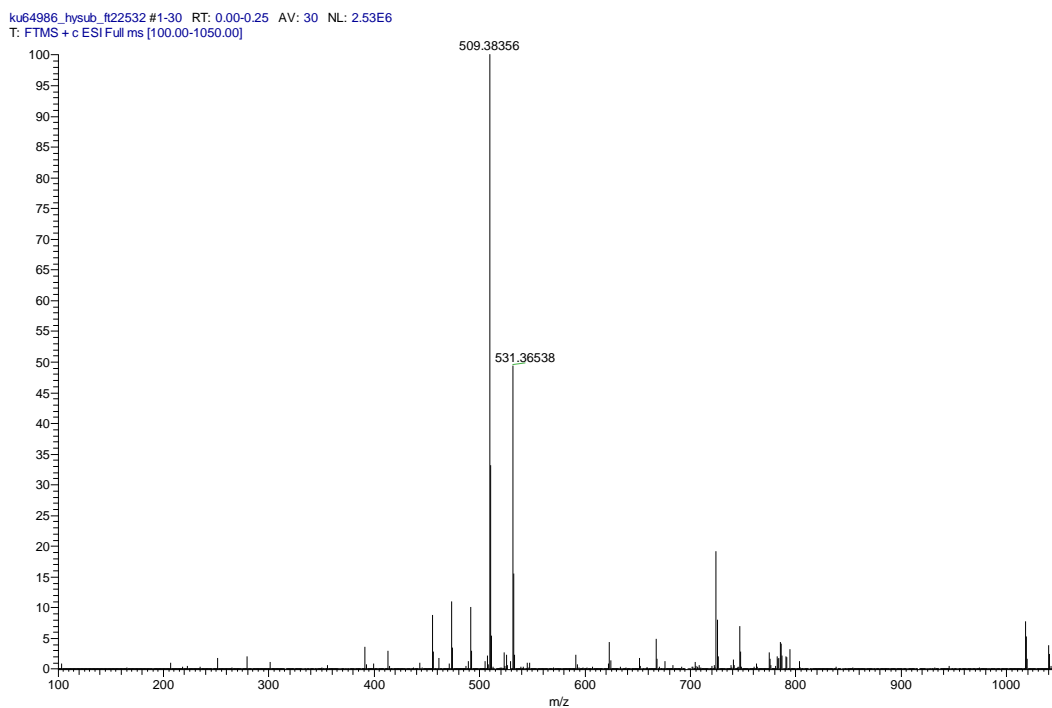

Figure S28. Full HRMS spectrum of compound **10**.

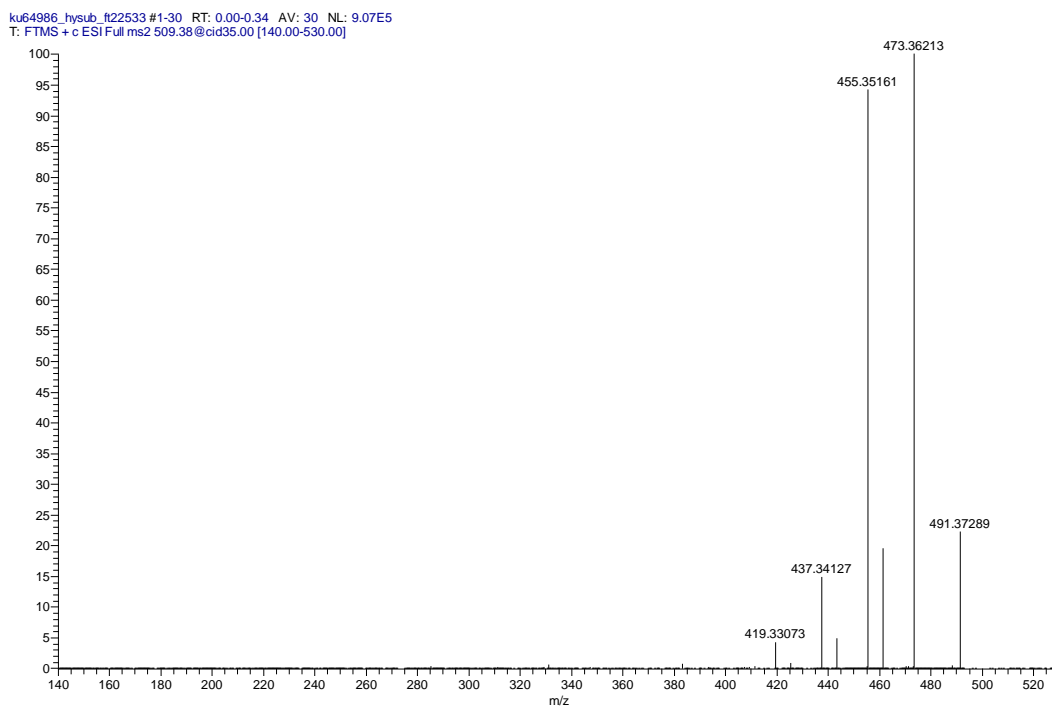

Figure S29. HR-MS/MS spectrum of compound **10**.

Nucleus: 1H  
Solvent: METHANOL-d4  
Number of Transients: 16  
Acquisition Time (sec): 4.0894  
Pulse Sequence: zg30  
Frequency (MHz): 399.8020  
Temperature (degree C): 25.003

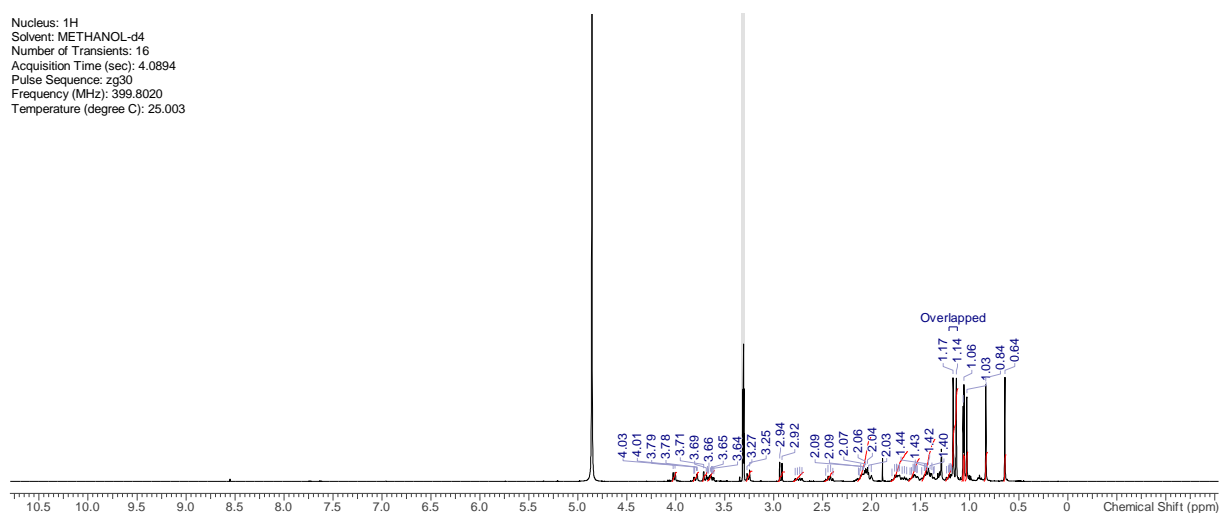

Figure S30. The  $^1\text{H}$  spectrum of compound **10**.

Nucleus: 13C  
Solvent: METHANOL-d4  
Number of Transients: 4096  
Acquisition Time (sec): 1.3631  
Pulse Sequence: zgpg30  
Frequency (MHz): 100.5303  
Temperature (degree C): 25.000

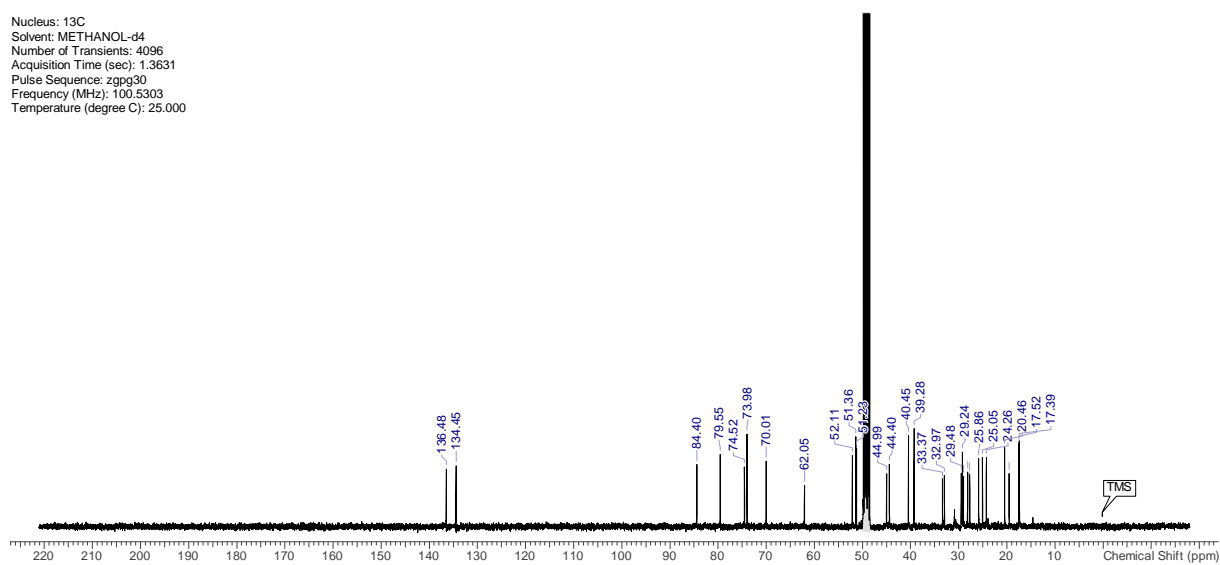

Figure S31. The  $^{13}\text{C}$  spectrum of compound **10**.

## NMR and MS Spectra and Spectral Data of Compound 11

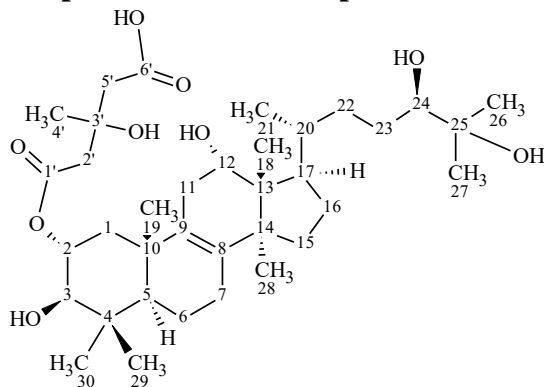

HRMS: M-H=635.41658 ( $\delta=0.2$  ppm; C<sub>36</sub>H<sub>59</sub>O<sub>9</sub>). HR-ESI-MS-MS (CID=45%; rel. int. %): 573(68); 533(100); 515(3); 491(19); 473(4).

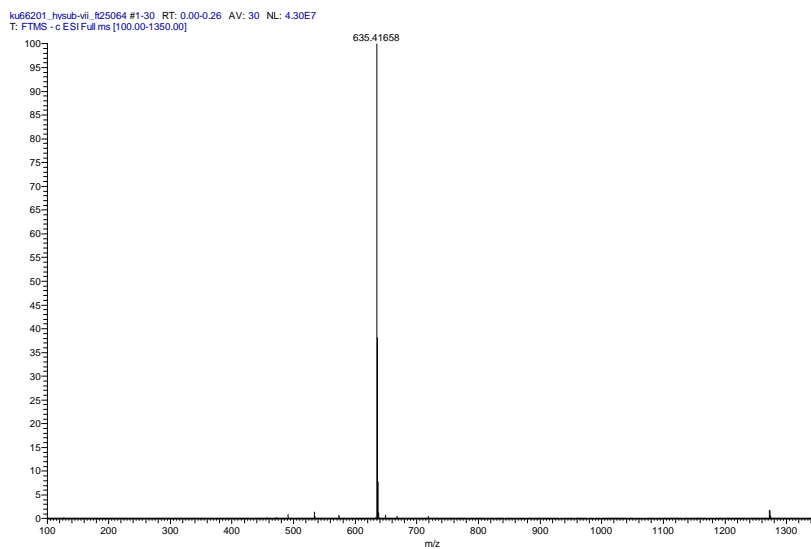

Figure S32. Full HRMS spectrum of compound 11.

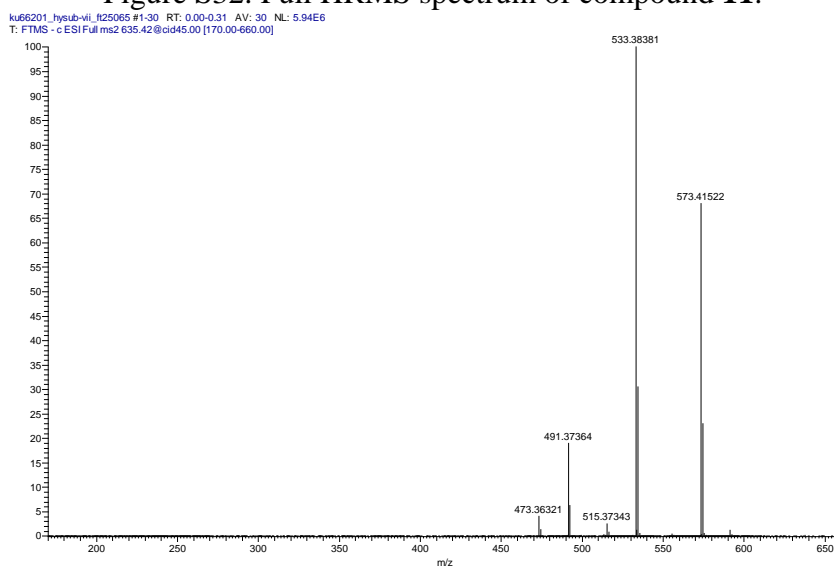

Figure S33. HR-MS/MS spectrum of compound 11.



Table S3. NMR assignments of compound **11**.

| Trivial name |          | Fasciculic acid B |         |                       |
|--------------|----------|-------------------|---------|-----------------------|
| Atom#        |          | C Shift           | H Shift | Multiplicity (J Hz)   |
| 1            | $\alpha$ | 42.2              | 1.24    | m                     |
| 1            | $\beta$  | 42.2              | 2.09    | m                     |
| 2            |          | 74.5              | 5.00    | ddd (11.6, 10.2, 4.3) |
| 3            |          | 81.0              | 3.20    | d (10.1)              |
| 4            |          | 40.8              |         |                       |
| 5            |          | 51.9              | 1.21    | m                     |
| 6            | $\alpha$ | 19.5              | 1.58    | m                     |
| 6            | $\beta$  | 19.5              | 1.74    | m                     |
| 7            |          | 27.6              | 2.10    | m                     |
| 8            |          | 136.9             |         |                       |
| 9            |          | 133.7             |         |                       |
| 10           |          | 39.4              |         |                       |
| 11           | $\alpha$ | 34.6              | 2.02    | m                     |
| 11           | $\beta$  | 34.6              | 2.62    | m                     |
| 12           |          | 73.7              | 4.00    | d (7.6)               |
| 13           |          | 50.7              |         |                       |
| 14           |          | 50.9              |         |                       |
| 15           | $\alpha$ | 33.4              | 1.69    | m                     |
| 15           | $\beta$  | 33.4              | 1.17    | m                     |
| 16           | $\alpha$ | 29.1              | 2.04    | m                     |
| 16           | $\beta$  | 29.1              | 1.38    | m                     |
| 17           |          | 44.2              | 2.21    | m                     |
| 18           |          | 17.1              | 0.66    | s                     |
| 19           |          | 20.4              | 1.11    | s                     |
| 20           |          | 37.7              | 1.44    | m                     |
| 21           |          | 18.1              | 1.03    | d (6.4)               |
| 22           |          | 34.5              | 1.36    | m                     |
| 22           |          | 34.5              | 1.53    | m                     |
| 23           |          | 29.1              | 1.38    | m                     |
| 23           |          | 29.1              | 1.52    | m                     |
| 24           |          | 79.9              | 3.23    | dd (10.0, 1.5)        |
| 25           |          | 74.1              |         |                       |
| 26           |          | 25.8              | 1.17    | s                     |
| 27           |          | 25.1              | 1.14    | s                     |
| 28           |          | 25.4              | 1.10    | s                     |
| 29           |          | 17.3              | 0.88    | s                     |
| 30           |          | 29.1              | 1.06    | s                     |
| 1'           |          | 172.8             |         |                       |
| 2'           |          | 46.9              | 2.71    | br s                  |
| 3'           |          | 71.1              |         |                       |
| 4'           |          | 28.0              | 1.41    | s                     |
| 4'           |          | 46.0              | 2.66    | m (AB?)               |
| 5'           |          | 175.5             |         |                       |

Nucleus: 1H  
Solvent: METHANOL-d4  
Number of Transients: 16  
Acquisition Time (sec): 2.9997  
Pulse Sequence: zg  
Frequency (MHz): 499.9100  
Temperature (degree C): 25.000

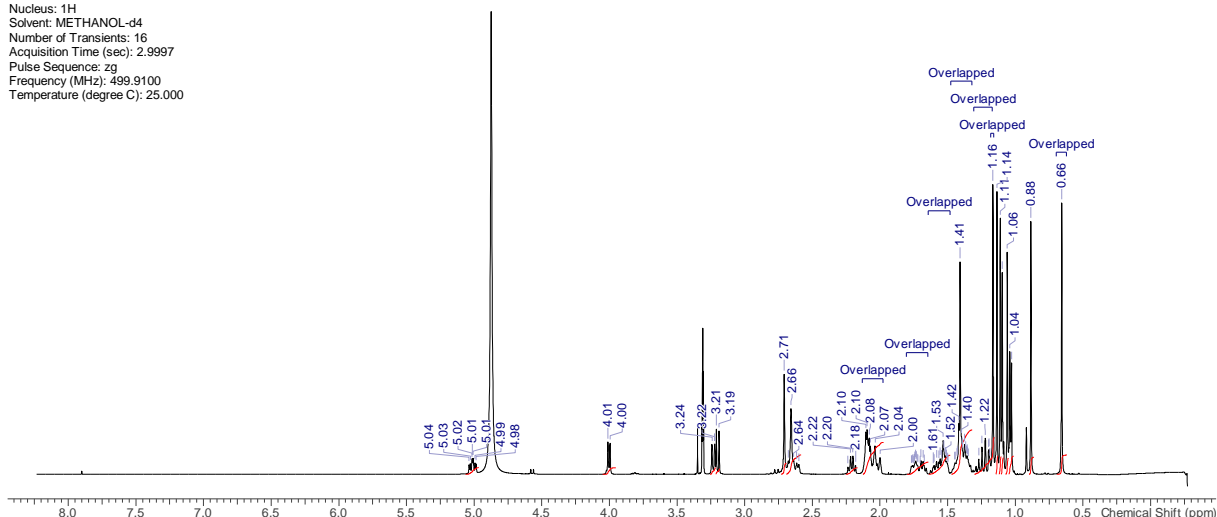

Figure S34. The  $^1\text{H}$  spectrum of compound **11**.

Nucleus: 13C  
Solvent: METHANOL-d4  
Number of Transients: 3125  
Acquisition Time (sec): 1.1010  
Pulse Sequence: zgpg  
Frequency (MHz): 125.7023  
Temperature (degree C): 24.999

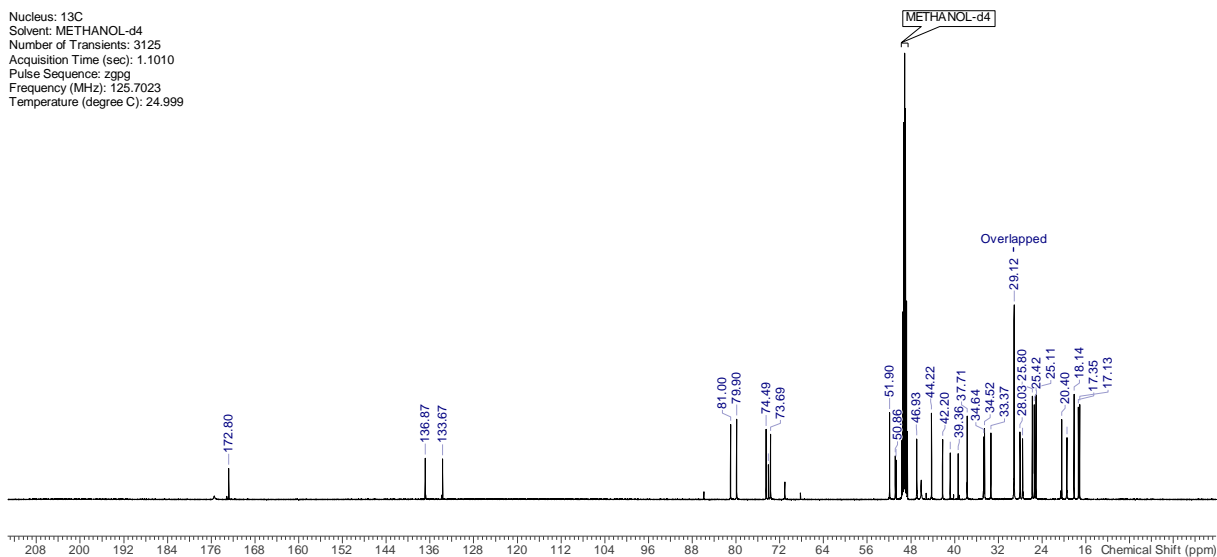

Figure S35. The  $^{13}\text{C}$  spectrum of compound **11**.

## NMR and MS Spectra and Spectral Data of Compound 12

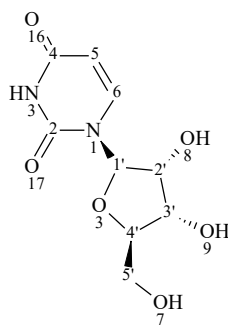

HRMS:  $M+Na=267.05876$  ( $\delta=0.01$  ppm;  $C_9H_{12}O_6N_2Na$ ). HR-ESI-MS-MS (CID=55%; rel. int. %): 155(20); 135(100).

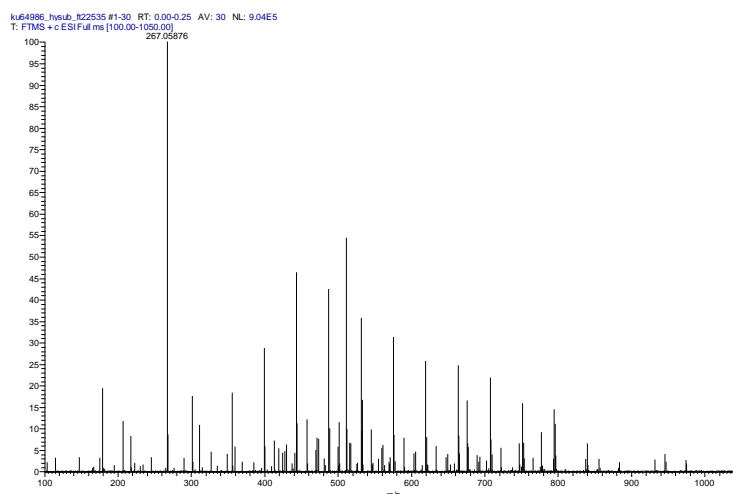

Figure S36. Full HRMS spectrum of compound 12.

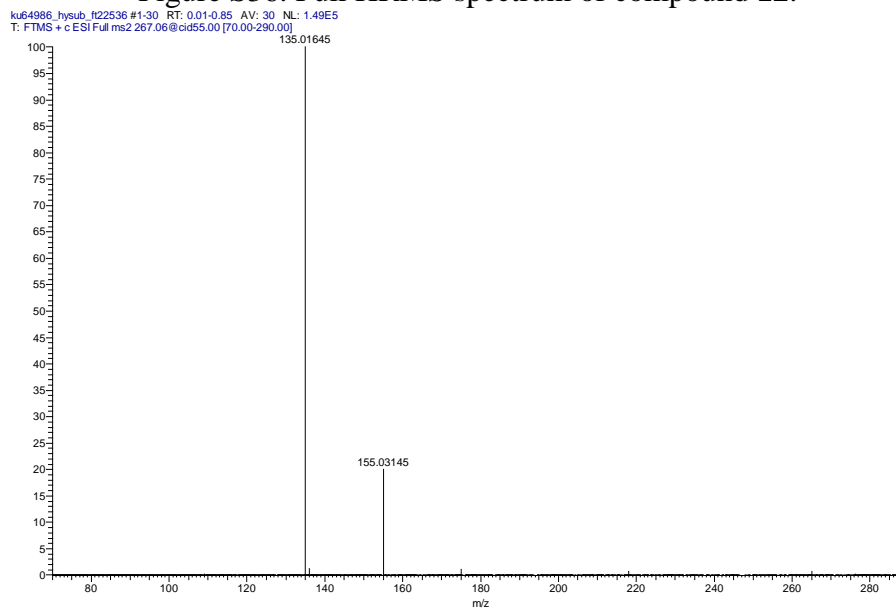

Figure S37. HR-MS/MS spectrum of compound 12.

$^1\text{H}$  NMR (400 MHz, METHANOL- $d_4$ )  $\delta$  = 7.94 (1H, d,  $J$  = 8.0 Hz, H-6), 5.89 (1H, d,  $J$  = 4.4 Hz, H-1'), 5.69 (1H, d,  $J$  = 8.0 Hz, H-5), 4.14 - 4.19 (1H, m, H-2'), 4.12 - 4.16 (1H, m, H-3'), 4.00 (1H, dt,  $J$  = 4.6 Hz,  $J$  = 3.0 Hz, H-4'), 3.84 (1H, dd,  $J$  = 11.9 Hz,  $J$  = 2.7 Hz, H-5'), 3.73 (1H, dd,  $J$  = 11.9 Hz,  $J$  = 3.4 Hz, H-5')

$^{13}\text{C}$  NMR (101 MHz, METHANOL- $d_4$ )  $\delta$  = 142.5 (C-6), 103.0 (C-5), 91.2 (C-1'), 86.4 (C-4'), 75.9 (C-2'), 71.4 (C-3'), 62.5 (C-5')

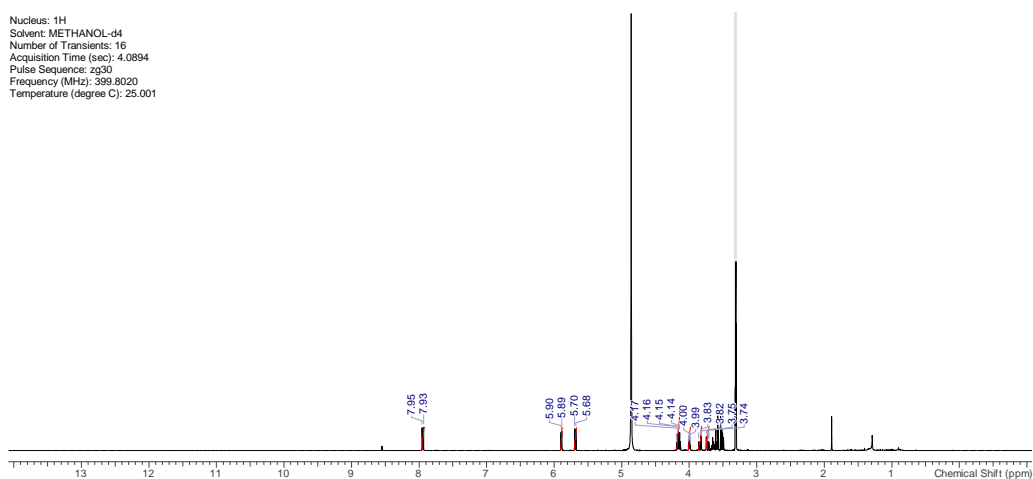

Figure S38. The  $^1\text{H}$  spectrum of compound **12**.

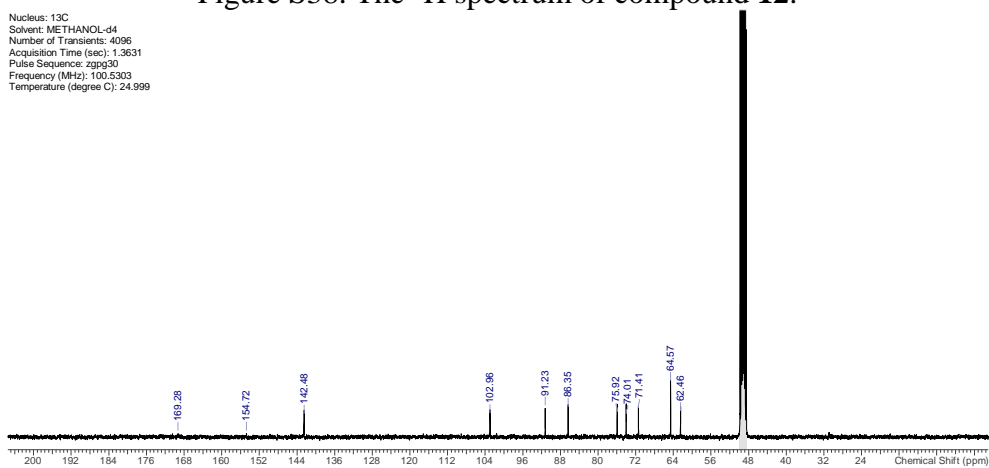

Figure S39. The  $^{13}\text{C}$  spectrum of compound **12**.
